# Supplementary material for: Probabilistic risk assessment and water quality index of a tropical delta river
Source: PeerJ. 2021 Nov 29;9:e12487. doi: 10.7717/peerj.12487 (PMC8638567; doi:10.7717/peerj.12487)
Supplement: Supplemental Information 1 [file peerj-09-12487-s001.xlsx]

## Sheet: Raw data
	units	Mean	SD	Min	Max	Mean	SD	Min	Max	Mean	SD	Min	Max	Mean	SD	Min	Max
code	units	Mean	SD	Min	Max	Mean	SD	Min	Max	Mean	SD	Min	Max	Mean	SD	Min	Max
Air Temp	0C	29.9333	29.9278	29.9801	29.9951	29.4167	29.4431	29.4216	29.3734	28.5583	28.6882	28.7455	28.816	30.3167	30.2597	30.2814	30.3881
Water Temp	0C	26.2667	26.3222	26.3491	26.4782	26.775	26.7563	26.6526	26.607	27.0917	27.141	27.1611	27.1161	27.6833	27.6569	27.545	27.5904
pH		5.79667	5.77139	5.81067	5.81156	5.48	5.48667	5.45222	5.48991	5.72083	5.7559	5.76056	5.80727	5.635	5.65458	5.64247	5.721
EC	µS/cm	120.292	123.383	123.64	125.876	172.808	174.684	177.249	178.978	166.258	165.572	169.669	171.233	134.642	140.462	141.609	139.801
Sal.	g/l	0.0541667	0.0555139	0.05564	0.0566101	0.078	0.0788333	0.0799861	0.080735	0.075	0.0746667	0.0766389	0.0773588	0.0608333	0.0634861	0.0640266	0.0631955
Col.	Pt.Co	4.86667	4.91389	4.86505	5.0038	6.65833	6.62153	6.70666	6.92388	6.45	6.24583	6.25799	6.36282	5.38333	5.45694	5.47836	5.60989
Turb.	NTU	3.925	3.92708	3.86267	3.97623	5.54167	5.45347	5.55793	5.71276	4.95	4.8875	4.81146	4.85408	4.29167	4.35764	4.30411	4.40445
TSS	mg/l	6.15	6.2125	6.20521	6.31398	9.325	9.47708	9.80017	10.1002	8.475	8.49792	8.60608	8.80658	7.05833	7.23819	7.30804	7.45038
TDS	mg/l	60.2833	61.8236	61.8506	62.9798	88.225	88.2354	89.605	90.6055	82.1	82.7917	84.7826	85.5812	67.2583	70.1965	70.7712	69.7772
DO	mg/l	6.225	6.18542	6.24253	6.24608	5.66667	5.69722	5.77199	5.81132	5.66667	5.73056	5.7331	5.86919	5.86667	5.83889	5.87546	5.87342
BOD5	mg/l	2.34167	2.29514	2.21973	2.24638	3.44167	3.46181	3.43362	3.44476	3	2.95833	2.97986	3.04485	2.44167	2.47014	2.35098	2.25523
COD	mg/l	10.675	10.0146	9.8908	9.94837	18.45	17.0375	17.274	17.3218	15.6333	13.7444	13.8148	14.2244	12.6167	12.0431	11.7633	11.5603
HCo3	mg/l	20.7833	19.4653	19.5624	20.1759	41.6083	41.509	40.9014	41.2599	39.5	38.25	38.8875	40.0948	29.1833	28.0486	27.336	27.064
Na	mg/l	0.831667	0.858472	0.876678	0.911401	1.11583	1.13799	1.18365	1.22396	1.03917	1.04743	1.07055	1.11393	0.925	0.950417	0.995451	0.994239
K	mg/l	0.135833	0.141319	0.141429	0.148215	0.231667	0.240139	0.244317	0.257177	0.188333	0.189861	0.196516	0.208726	0.14	0.144167	0.143681	0.147321
Ca	mg/l	1.795	1.87625	1.91844	1.99664	2.68917	2.7891	2.86152	2.99415	2.53833	2.61819	2.72388	2.8517	1.80667	1.89139	1.959	1.99476
Mg	mg/l	0.598333	0.624861	0.644433	0.677302	0.871667	0.902639	0.960359	0.987889	0.719167	0.729931	0.751591	0.785057	0.5825	0.613542	0.646337	0.631032
Cl	mg/l	23.2417	23.7035	24.6454	25.8992	43.3083	45.6507	47.3299	48.9824	38.5667	40.6222	42.4991	44.1157	26.8833	27.6486	28.2277	27.6216
P	mg/l	0.651667	0.690972	0.709387	0.737669	1.2725	1.32937	1.40682	1.48239	1.25833	1.29986	1.33985	1.4115	0.836667	0.890556	0.934769	0.963499
NH4H	mg/l	0.09025	0.0844375	0.084724	0.0893676	0.202333	0.190861	0.196183	0.198948	0.178083	0.143757	0.15057	0.153368	0.118917	0.117993	0.119076	0.113082
No2	mg/l	0.052	0.0463333	0.0471111	0.0501204	0.138667	0.0927222	0.0966991	0.0988407	0.13375	0.0857292	0.0884566	0.092328	0.0793333	0.0717778	0.0751759	0.0756906
NO3	mg/l	1.5475	1.52062	1.48568	1.54198	2.95667	2.92972	3.06387	3.24169	2.86333	2.80611	2.90162	3.07926	1.76833	1.79153	1.83666	1.89388
SO4	mg/l	0.634167	0.660347	0.652043	0.678046	1.07333	1.11861	1.14266	1.16622	0.956667	0.985556	0.992685	1.02208	0.82	0.851667	0.862639	0.856192
Fe	mg/l	0.681667	0.695972	0.722303	0.759162	1.79333	1.87278	1.96301	2.03409	1.49917	1.5466	1.65298	1.73656	0.898333	0.918194	0.957211	0.934478
Mn	mg/l	0.0686667	0.0709722	0.0725532	0.0774327	0.156167	0.163514	0.17214	0.178735	0.114667	0.118306	0.127248	0.134352	0.0934167	0.0985347	0.0989126	0.0982387
Zn	mg/l	0.255833	0.258819	0.266221	0.280906	0.6725	0.687708	0.725017	0.742102	0.5875	0.593958	0.635955	0.661451	0.388333	0.394861	0.416933	0.401677
Cu	mg/l	0.0344167	0.0363681	0.0364821	0.0377722	0.0648333	0.0645694	0.0683669	0.0699808	0.061	0.0601667	0.0617639	0.0646609	0.0389167	0.0394931	0.0419508	0.0393634
Cr	mg/l	0.0111667	0.0105139	0.0105567	0.0114364	0.0354417	0.0358118	0.0369628	0.0396264	0.0370833	0.0380069	0.0399242	0.0408345	0.0203333	0.0199444	0.0216065	0.019657
Cd	mg/l	0.012	0.0115	0.0119583	0.0129549	0.0316667	0.0324722	0.0323449	0.0335403	0.0295	0.028375	0.0286562	0.0310443	0.0250833	0.0224236	0.0228756	0.0223652
Ni	mg/l	0.00225	0.0024375	0.00264063	0.00286068	0.0131667	0.0110139	0.0119317	0.0120927	0.01125	0.00777083	0.0084184	0.00911994	0.00491667	0.00532639	0.00577025	0.00516778
Pb	mg/l	0.0125	0.0125417	0.0120035	0.0130038	0.03725	0.0389375	0.0391823	0.0420308	0.0351667	0.0369306	0.0376748	0.0398143	0.0140833	0.0130069	0.0127575	0.0113207
V	mg/l	0.00175	0.00189583	0.00205382	0.00222497	0.0105833	0.00871528	0.00944155	0.00956168	0.00983333	0.00656944	0.0071169	0.00770997	0.00358333	0.00388194	0.00420544	0.00363923
THC	mg/l	0.0416667	0.0418056	0.0402894	0.0436468	0.114167	0.112847	0.114751	0.11848	0.09	0.0891667	0.0949306	0.0986748	0.0666667	0.0697222	0.0713657	0.0698129

## Sheet: RAW data WQI
		code	A	A	A	A	A	A	A	A	A	A	A	A	A	A	A	A	A	A				B	B	B	B	B	B	B	B	B	B	B	B	B	B	B	B	B	B				C	C	C	C	C
	35	Water Temp	25.6	26	24.8	25.9	24.6	27.2	27	26.3	27.2	27.8	27	25.8	25.6	26.9	24.8	25.9	24.6	27.2				27	28	27.2	26.1	24.9	26.7	25.9	27.1	27.3	27.5	26.5	27.1	27	27	27.2	26.7	24.9	26.7				26.5	26.9	27.7	26.1	27
	7.5	pH	6.1	5.3	5.8	6.3	5.8	5.92	6.36	6.82	4.94	5.07	5.32	5.83	5.75	5.61667	5.90556	5.98759	6.03056	6.02667				5.4	5.9	5	6.1	5	5.34	6.12	5.94	4.11	5.22	5.91	5.72	5.68	5.52667	5.54222	5.67667	6.00111	5.48667				5.3	5.7	5.2	6.5	5.3
	15	Col.	4.3	5.5	3.2	4.9	5.4	7.1	10.4	6.3	2.8	1.7	4.7	2.1	3.7	4.13333	4.07778	5.40463	4.50278	7.63333				7.1	5.6	4.1	7.8	5.8	12.7	15.3	8.1	3.1	2.3	5.1	2.9	5.03	4.91	5.60333	7.89247	6.80741	11.2667				8.9	6.1	5	6.3	5.5
	5	Turb.	3.9	4.7	2.5	3.3	4.1	6.9	8.4	4.8	2.1	1.2	3.9	1.3	3.03	3.41	3.07	4.26889	3.27	6.46667				6.6	4.2	3.7	6.2	3.9	11.4	13.9	5.4	2.8	1.8	4.8	1.8	4.4	4.1	4.66667	6.66037	5.58111	9.73333				5.7	5.8	4.3	5.4	4.7
	10	TSS	5.4	6.3	4.9	2.8	4.5	9.3	12.5	6.6	5.3	6.7	5.9	3.6	4.97	5.39	4.36333	5.65611	3.83833	8.76667				7.5	5.6	6.2	8.8	9.1	15.1	19.4	13.5	5.9	9.1	7	4.7	6.4	6.06667	7.02222	9.82346	7.91481	14.5333				8.2	7.2	6.2	7.7	9.5
	500	TDS	41.8	61.5	48.3	52.9	33.9	70.4	82.3	46.7	90.6	71	76.1	47.9	55.26	55.02	52.0733	55.8322	53.2233	62.2				88.1	71.8	77.6	57	64.5	110.3	97	77	141.3	94.5	105.6	74	89.23	79.5433	71.3811	75.5028	64.5274	90.6				73.8	58.9	75.2	70.2	50.1
	7.5	DO	6.7	5.5	6.2	6.6	7.1	5.4	6.1	6.8	6.5	5.8	6.3	5.7	6.23	5.97667	6.25889	6.27259	6.35889	6.2				5.3	4.8	5.3	6.4	5.8	4.9	5.7	5.4	6.8	5.4	6.9	5.3	5.83	5.31	5.67	5.6837	5.91444	5.46667				4.9	5.7	4.1	6.1	6.7
	0	BOD5	2.9	3.2	1.9	2.5	1.6	2.2	1.7	1.9	2.9	3.1	2.3	1.9	2.37	2.49	2.29667	2.19222	2.44667	1.83333				3.2	3.8	3.3	3.9	4.7	3.9	3	2.8	4.1	3.7	2.6	2.3	2.7	3.26667	3.48889	3.67025	3.65519	3.86667				3.5	2.7	2.2	4.4	3.3
	200	HCo3	36.6	18.3	12.2	18.8	12.2	24.4	17.5	12.2	54.2	12.2	18.6	12.2	22.45	17.65	16.2167	17.3722	17.8667	18.0333				42.8	48.8	36.6	24.4	36.6	61	45.8	24.4	61	34.6	46.7	36.6	42.03	42.4767	34.4922	37.8349	31.2126	47.8				54.5	30.6	24.4	45.1	30.5
	200	Na	0.51	0.64	0.46	0.59	0.71	0.62	1.26	0.52	1.82	0.64	1.37	0.84	0.91	0.67	0.573333	0.680833	0.605833	0.863333				0.85	0.59	0.7	1.05	0.85	1.2	1.39	1.07	2.19	0.81	1.58	1.11	1.18	0.823333	0.857778	0.978765	0.931852	1.14667				0.94	0.77	0.55	0.83	0.64
	200	Cl	17.7	12.4	9.6	12.4	9.4	24.2	36.7	7	73.2	22.5	38.5	15.3	23.83	15.2767	12.4256	16.3281	13.1256	23.4333				15.2	25.5	27.5	20.2	17.7	85.4	44.1	21.5	150.3	34.1	59.2	19	31.13	28.0433	25.2478	32.5733	23.4056	49.0667				13.9	18.1	23.1	29.1	11.5
	5	P	0.18	0.47	0.37	0.71	0.5	0.74	1.26	0.12	1.3	0.59	1.25	0.33	0.59	0.476667	0.518889	0.652037	0.603889	0.833333				0.59	0.4	0.5	0.93	0.85	1.48	3.11	0.33	3.28	0.79	2.4	0.61	1.2	0.7	0.71	1.15858	0.952407	1.81333				0.76	0.82	0.48	1.12	0.77
	1	NH4H	0.16	0.081	0.029	0.055	0.081	0.105	0.153	0.022	0.153	0.085	0.136	0.023	0.11	0.0733333	0.0524444	0.0747963	0.0589444	0.113				0.34	0.127	0.163	0.139	0.293	0.325	0.201	0.07	0.324	0.121	0.274	0.051	0.22	0.17	0.157333	0.187914	0.133407	0.273				0.59	0.062	0.117	0.082	0.109
	1	No2	0.12	0.037	0.011	0.039	0.09	0.053	0.063	0.018	0.072	0.03	0.073	0.018	0.07	0.0393333	0.0297778	0.0450741	0.0367778	0.0686667				0.69	0.045	0.071	0.104	0.19	0.094	0.115	0.06	0.105	0.061	0.092	0.037	0.27	0.128667	0.101222	0.114654	0.109741	0.133				0.71	0.053	0.042	0.121	0.13
	10	NO3	1.87	1.94	0.81	1.32	0.74	1.85	2.48	1.36	2.38	1.05	1.83	0.94	1.55	1.43333	1.18778	1.39769	1.31528	1.69				3.28	1.32	0.93	1.84	1.01	3.42	5.53	3.31	6.27	2.86	4.2	1.51	2.99	1.74667	1.50556	2.19068	1.74648	3.32				3.55	1.66	0.77	1.61	1.24
	500	SO4	0.32	0.76	0.34	0.54	0.38	0.96	0.83	0.59	1.49	0.48	0.65	0.27	0.41	0.503333	0.461111	0.565185	0.511111	0.723333				0.53	0.83	0.86	0.77	0.85	1.54	1.2	1.13	2.3	0.91	1.33	0.63	0.83	0.84	0.823333	0.950556	0.831667	1.19667				0.61	0.9	0.64	1.05	0.47
	1	Fe	0.51	0.38	0.28	0.52	0.34	0.51	0.84	0.19	0.99	1.28	1.85	0.49	0.95	0.536667	0.445556	0.504815	0.505556	0.563333				0.84	0.79	1.11	0.74	1.22	2.43	3.19	0.57	4.12	2.27	3.29	0.95	1.69	1.19667	1.01556	1.36451	0.797963	2.28				0.93	0.27	0.65	0.81	1.1
	0.05	Mn	0.041	0.052	0.014	0.08	0.02	0.06	0.093	0.026	0.17	0.09	0.12	0.058	0.073	0.0463333	0.0467778	0.0559074	0.0632778	0.0576667				0.068	0.06	0.093	0.12	0.25	0.19	0.318	0.131	0.23	0.15	0.19	0.074	0.11	0.0876667	0.100222	0.150333	0.0981111	0.252667				0.071	0.011	0.042	0.1	0.14
	1	Zn	0.22	0.17	0.09	0.15	0.1	0.32	0.29	0.14	0.52	0.39	0.55	0.13	0.3	0.186667	0.142222	0.178704	0.157222	0.236667				0.49	0.24	0.52	0.34	0.59	0.94	1.03	0.66	1.35	0.61	0.92	0.38	0.59	0.45	0.436667	0.547346	0.352037	0.853333				0.51	0.09	0.33	0.39	0.44
	0.1	Cu	0.011	0.035	0.021	0.009	0.013	0.029	0.033	0.01	0.08	0.053	0.09	0.029	0.04	0.032	0.0206667	0.0211111	0.0176667	0.025				0.068	0.019	0.049	0.014	0.026	0.087	0.091	0.017	0.13	0.094	0.13	0.053	0.08	0.0493333	0.0374444	0.0428704	0.0231667	0.068				0.071	0.041	0.027	0.01	0.019
	0.05	Cr	0.019	0.01	0	0	0.01	0.017	0.012	0	0.018	0	0.048	0	0.02	0.01	0.00333333	0.00655556	0.00333333	0.013				0.031	0.022	0.005	0.011	0.038	0.058	0.041	0	0.0533	0.015	0.126	0.025	0.06	0.029	0.015	0.0268889	0.02	0.0456667				0.026	0.015	0.029	0.02	0.03
	0.01	Cd	0.018	0.006	0	0	0.017	0.009	0.015	0	0.035	0	0.035	0.009	0.02	0.00866667	0.00288889	0.00648148	0.00288889	0.0136667				0.022	0.034	0.018	0.032	0.051	0.028	0.025	0	0.061	0.009	0.081	0.019	0.04	0.0306667	0.0268889	0.0296049	0.0272593	0.0346667				0.043	0.025	0	0.019	0.042
	0.05	Ni	0	0	0	0	0.008	0	0	0	0.004	0	0.015	0	0.005	0.00166667	0.000555556	0.00125926	0.000555556	0.00266667				0.039	0	0.01	0	0.024	0.019	0	0	0.028	0	0.038	0	0.025	0.0116667	0.00722222	0.00795062	0.0022963	0.0143333				0.053	0	0	0	0.015
	0.05	Pb	0.012	0.019	0	0	0.003	0.011	0.005	0	0	0	0.083	0.017	0.037	0.0186667	0.00622222	0.00625926	0.00622222	0.00633333				0.017	0.036	0.005	0.016	0.031	0.05	0.026	0	0.09	0.017	0.121	0.038	0.056	0.0323333	0.0177778	0.0250494	0.0217037	0.0356667				0.014	0.028	0.012	0.022	0.029
	0.01	V	0	0	0	0	0.006	0	0	0	0.003	0	0.012	0	0.004	0.00133333	0.000444444	0.000962963	0.000444444	0.002				0.033	0	0.008	0	0.021	0.016	0	0	0.025	0	0.024	0	0.019	0.009	0.00566667	0.00671605	0.00214815	0.0123333				0.049	0	0	0	0.012
	0.05	THC	0.04	0.06	0	0	0.08	0.05	0.09	0.03	0.02	0.03	0.08	0.02	0.05	0.0366667	0.0122222	0.0325926	0.0122222	0.0733333				0.13	0.09	0.07	0.09	0.14	0.1	0.18	0.07	0.15	0.09	0.17	0.09	0.13	0.0966667	0.0855556	0.102222	0.0811111	0.14				0.1	0.02	0.05	0.08	0.11
		Station 1 Mar.																								Station 2 Mar.																				Station 3 Mar.
		V actual	V ideal	V Standard	V actual - V ideal	V Standard -V ideal	Qi	Wi	WiQi																	V actual	V ideal	V Standard	V actual - V ideal	V Standard -V ideal	Qi	Wi	WiQi													V actual	V ideal	V Standard	V actual - V ideal
	Water Temp	25.6	0	35	25.6	35	73.1429	0.0285714	2.0898																Water Temp	27	0	35	27	35	77.1429	0.0285714	2.20408												Water Temp	26.5	0	35	26.5
	pH	6.1	7	7.5	0.9	0.5	180	0.133333	24																pH	5.4	7	7.5	1.6	0.5	320	0.133333	42.6667												pH	5.3	7	7.5	1.7
	Col.	4.3	0	15	4.3	15	28.6667	0.0666667	1.91111																Col.	7.1	0	15	7.1	15	47.3333	0.0666667	3.15556												Col.	8.9	0	15	8.9
	Turb.	3.9	0	5	3.9	5	78	0.2	15.6																Turb.	6.6	0	5	6.6	5	132	0.2	26.4												Turb.	5.7	0	5	5.7
	TSS	5.4	0	10	5.4	10	54	0.1	5.4																TSS	7.5	0	10	7.5	10	75	0.1	7.5												TSS	8.2	0	10	8.2
	TDS	41.8	0	500	41.8	500	8.36	0.002	0.01672																TDS	88.1	0	500	88.1	500	17.62	0.002	0.03524												TDS	73.8	0	500	73.8
	DO	6.7	14.6	7.5	-7.9	-7.1	111.268	0.133333	14.8357																DO	5.3	14.6	7.5	-9.3	-7.1	130.986	0.133333	17.4648												DO	4.9	14.6	7.5	-9.7
	BOD5	2.9	0	1	2.9	1	290	1	290																BOD5	3.2	0	1	3.2	1	320	1	320												BOD5	3.5	0	1	3.5
	HCo3	36.6	0	200	36.6	200	18.3	0.005	0.0915																HCo3	42.8	0	200	42.8	200	21.4	0.005	0.107												HCo3	54.5	0	200	54.5
	Na	0.51	0	200	0.51	200	0.255	0.005	0.001275																Na	0.85	0	200	0.85	200	0.425	0.005	0.002125												Na	0.94	0	200	0.94
	Cl	17.7	0	200	17.7	200	8.85	0.005	0.04425																Cl	15.2	0	200	15.2	200	7.6	0.005	0.038												Cl	13.9	0	200	13.9
	P	0.18	0	5	0.18	5	3.6	0.2	0.72																P	0.59	0	5	0.59	5	11.8	0.2	2.36												P	0.76	0	5	0.76
	NH4H	0.16	0	1	0.16	1	16	1	16																NH4H	0.34	0	1	0.34	1	34	1	34												NH4H	0.59	0	1	0.59
	No2	0.12	0	1	0.12	1	12	1	12																No2	0.69	0	1	0.69	1	69	1	69												No2	0.71	0	1	0.71
	NO3	1.87	0	10	1.87	10	18.7	0.1	1.87																NO3	3.28	0	10	3.28	10	32.8	0.1	3.28												NO3	3.55	0	10	3.55
	SO4	0.32	0	500	0.32	500	0.064	0.002	0.000128																SO4	0.53	0	500	0.53	500	0.106	0.002	0.000212												SO4	0.61	0	500	0.61
	Fe	0.51	0	1	0.51	1	51	1	51																Fe	0.84	0	1	0.84	1	84	1	84												Fe	0.93	0	1	0.93
	Mn	0.041	0	0.05	0.041	0.05	82	20	1640																Mn	0.068	0	0.05	0.068	0.05	136	20	2720												Mn	0.071	0	0.05	0.071
	Zn	0.22	0	1	0.22	1	22	1	22																Zn	0.49	0	1	0.49	1	49	1	49												Zn	0.51	0	1	0.51
	Cu	0.011	0	0.1	0.011	0.1	11	10	110																Cu	0.068	0	0.1	0.068	0.1	68	10	680												Cu	0.071	0	0.1	0.071
	Cr	0.019	0	0.05	0.019	0.05	38	20	760																Cr	0.031	0	0.05	0.031	0.05	62	20	1240												Cr	0.026	0	0.05	0.026
	Cd	0.018	0	0.01	0.018	0.01	180	100	18000																Cd	0.022	0	0.01	0.022	0.01	220	100	22000												Cd	0.043	0	0.01	0.043
	Ni	0	0	0.05	0	0.05	0	20	0																Ni	0.039	0	0.05	0.039	0.05	78	20	1560												Ni	0.053	0	0.05	0.053
	Pb	0.012	0	0.05	0.012	0.05	24	20	480																Pb	0.017	0	0.05	0.017	0.05	34	20	680												Pb	0.014	0	0.05	0.014
	V	0	0	0.01	0	0.01	0	100	0																V	0.033	0	0.01	0.033	0.01	330	100	33000												V	0.049	0	0.01	0.049
	THC	0.04	0	0.05	0.04	0.05	80	20	1600																THC	0.13	0	0.05	0.13	0.05	260	20	5200												THC	0.1	0	0.05	0.1
	Σ							315.981	23047.6																Σ							315.981	67741.2												Σ
	WQI								72.9398																WQI								214.384												WQI
		Station 1 Apr.																								Station 2 Apr.																				Station 3 Apr.
		V actual	V ideal	V Standard	V actual - V ideal	V Standard -V ideal	Qi	Wi	WiQi																	V actual	V ideal	V Standard	V actual - V ideal	V Standard -V ideal	Qi	Wi	WiQi													V actual	V ideal	V Standard	V actual - V ideal
	Water Temp	26	0	35	26	35	74.2857	0.0285714	2.12245																Water Temp	26	0	35	26	35	74.2857	0.0285714	2.12245												Water Temp	26.9	0	35	26.9
	pH	5.3	7	7.5	1.7	0.5	340	0.133333	45.3333																pH	5.3	7	7.5	1.7	0.5	340	0.133333	45.3333												pH	5.7	7	7.5	1.3
	Col.	5.5	0	15	5.5	15	36.6667	0.0666667	2.44444																Col.	5.5	0	15	5.5	15	36.6667	0.0666667	2.44444												Col.	6.1	0	15	6.1
	Turb.	4.7	0	5	4.7	5	94	0.2	18.8																Turb.	4.7	0	5	4.7	5	94	0.2	18.8												Turb.	5.8	0	5	5.8
	TSS	6.3	0	10	6.3	10	63	0.1	6.3																TSS	6.3	0	10	6.3	10	63	0.1	6.3												TSS	7.2	0	10	7.2
	TDS	61.5	0	500	61.5	500	12.3	0.002	0.0246																TDS	61.5	0	500	61.5	500	12.3	0.002	0.0246												TDS	58.9	0	500	58.9
	DO	5.5	14.6	7.5	-9.1	-7.1	128.169	0.133333	17.0892																DO	5.5	14.6	7.5	-9.1	-7.1	128.169	0.133333	17.0892												DO	5.7	14.6	7.5	-8.9
	BOD5	3.2	0	1	3.2	1	320	1	320																BOD5	3.2	0	1	3.2	1	320	1	320												BOD5	2.7	0	1	2.7
	HCo3	18.3	0	200	18.3	200	9.15	0.005	0.04575																HCo3	18.3	0	200	18.3	200	9.15	0.005	0.04575												HCo3	30.6	0	200	30.6
	Na	0.64	0	200	0.64	200	0.32	0.005	0.0016																Na	0.64	0	200	0.64	200	0.32	0.005	0.0016												Na	0.77	0	200	0.77
	Cl	12.4	0	200	12.4	200	6.2	0.005	0.031																Cl	12.4	0	200	12.4	200	6.2	0.005	0.031												Cl	18.1	0	200	18.1
	P	0.47	0	5	0.47	5	9.4	0.2	1.88																P	0.47	0	5	0.47	5	9.4	0.2	1.88												P	0.82	0	5	0.82
	NH4H	0.081	0	1	0.081	1	8.1	1	8.1																NH4H	0.081	0	1	0.081	1	8.1	1	8.1												NH4H	0.062	0	1	0.062
	No2	0.037	0	1	0.037	1	3.7	1	3.7																No2	0.037	0	1	0.037	1	3.7	1	3.7												No2	0.053	0	1	0.053
	NO3	1.94	0	10	1.94	10	19.4	0.1	1.94																NO3	1.94	0	10	1.94	10	19.4	0.1	1.94												NO3	1.66	0	10	1.66
	SO4	0.76	0	500	0.76	500	0.152	0.002	0.000304																SO4	0.76	0	500	0.76	500	0.152	0.002	0.000304												SO4	0.9	0	500	0.9
	Fe	0.38	0	1	0.38	1	38	1	38																Fe	0.38	0	1	0.38	1	38	1	38												Fe	0.27	0	1	0.27
	Mn	0.052	0	0.05	0.052	0.05	104	20	2080																Mn	0.052	0	0.05	0.052	0.05	104	20	2080												Mn	0.011	0	0.05	0.011
	Zn	0.17	0	1	0.17	1	17	1	17																Zn	0.17	0	1	0.17	1	17	1	17												Zn	0.09	0	1	0.09
	Cu	0.035	0	0.1	0.035	0.1	35	10	350																Cu	0.035	0	0.1	0.035	0.1	35	10	350												Cu	0.041	0	0.1	0.041
	Cr	0.01	0	0.05	0.01	0.05	20	20	400																Cr	0.01	0	0.05	0.01	0.05	20	20	400												Cr	0.015	0	0.05	0.015
	Cd	0.006	0	0.01	0.006	0.01	60	100	6000																Cd	0.006	0	0.01	0.006	0.01	60	100	6000												Cd	0.025	0	0.01	0.025
	Ni	0	0	0.05	0	0.05	0	20	0																Ni	0	0	0.05	0	0.05	0	20	0												Ni	0	0	0.05	0
	Pb	0.019	0	0.05	0.019	0.05	38	20	760																Pb	0.019	0	0.05	0.019	0.05	38	20	760												Pb	0.028	0	0.05	0.028
	V	0	0	0.01	0	0.01	0	100	0																V	0	0	0.01	0	0.01	0	100	0												V	0	0	0.01	0
	THC	0.06	0	0.05	0.06	0.05	120	20	2400																THC	0.06	0	0.05	0.06	0.05	120	20	2400												THC	0.02	0	0.05	0.02
	Σ							315.981	12472.8																Σ							315.981	12472.8												Σ
	WQI								39.4733																WQI								39.4733												WQI
		Station 1 May.																								Station 2 May.																				Station 3 May.
		V actual	V ideal	V Standard	V actual - V ideal	V Standard -V ideal	Qi	Wi	WiQi																	V actual	V ideal	V Standard	V actual - V ideal	V Standard -V ideal	Qi	Wi	WiQi													V actual	V ideal	V Standard	V actual - V ideal
	Water Temp	24.8	0	35	24.8	35	70.8571	0.0285714	2.02449																Water Temp	27.2	0	35	27.2	35	77.7143	0.0285714	2.22041												Water Temp	27.7	0	35	27.7
	pH	5.8	7	7.5	1.2	0.5	240	0.133333	32																pH	5	7	7.5	2	0.5	400	0.133333	53.3333												pH	5.2	7	7.5	1.8
	Col.	3.2	0	15	3.2	15	21.3333	0.0666667	1.42222																Col.	4.1	0	15	4.1	15	27.3333	0.0666667	1.82222												Col.	5	0	15	5
	Turb.	2.5	0	5	2.5	5	50	0.2	10																Turb.	3.7	0	5	3.7	5	74	0.2	14.8												Turb.	4.3	0	5	4.3
	TSS	4.9	0	10	4.9	10	49	0.1	4.9																TSS	6.2	0	10	6.2	10	62	0.1	6.2												TSS	6.2	0	10	6.2
	TDS	48.3	0	500	48.3	500	9.66	0.002	0.01932																TDS	77.6	0	500	77.6	500	15.52	0.002	0.03104												TDS	75.2	0	500	75.2
	DO	6.2	14.6	7.5	-8.4	-7.1	118.31	0.133333	15.7746																DO	5.3	14.6	7.5	-9.3	-7.1	130.986	0.133333	17.4648												DO	4.1	14.6	7.5	-10.5
	BOD5	1.9	0	1	1.9	1	190	1	190																BOD5	3.3	0	1	3.3	1	330	1	330												BOD5	2.2	0	1	2.2
	HCo3	12.2	0	200	12.2	200	6.1	0.005	0.0305																HCo3	36.6	0	200	36.6	200	18.3	0.005	0.0915												HCo3	24.4	0	200	24.4
	Na	0.46	0	200	0.46	200	0.23	0.005	0.00115																Na	0.7	0	200	0.7	200	0.35	0.005	0.00175												Na	0.55	0	200	0.55
	Cl	9.6	0	200	9.6	200	4.8	0.005	0.024																Cl	27.5	0	200	27.5	200	13.75	0.005	0.06875												Cl	23.1	0	200	23.1
	P	0.37	0	5	0.37	5	7.4	0.2	1.48																P	0.5	0	5	0.5	5	10	0.2	2												P	0.48	0	5	0.48
	NH4H	0.029	0	1	0.029	1	2.9	1	2.9																NH4H	0.163	0	1	0.163	1	16.3	1	16.3												NH4H	0.117	0	1	0.117
	No2	0.011	0	1	0.011	1	1.1	1	1.1																No2	0.071	0	1	0.071	1	7.1	1	7.1												No2	0.042	0	1	0.042
	NO3	0.81	0	10	0.81	10	8.1	0.1	0.81																NO3	0.93	0	10	0.93	10	9.3	0.1	0.93												NO3	0.77	0	10	0.77
	SO4	0.34	0	500	0.34	500	0.068	0.002	0.000136																SO4	0.86	0	500	0.86	500	0.172	0.002	0.000344												SO4	0.64	0	500	0.64
	Fe	0.28	0	1	0.28	1	28	1	28																Fe	1.11	0	1	1.11	1	111	1	111												Fe	0.65	0	1	0.65
	Mn	0.014	0	0.05	0.014	0.05	28	20	560																Mn	0.093	0	0.05	0.093	0.05	186	20	3720												Mn	0.042	0	0.05	0.042
	Zn	0.09	0	1	0.09	1	9	1	9																Zn	0.52	0	1	0.52	1	52	1	52												Zn	0.33	0	1	0.33
	Cu	0.021	0	0.1	0.021	0.1	21	10	210																Cu	0.049	0	0.1	0.049	0.1	49	10	490												Cu	0.027	0	0.1	0.027
	Cr	0	0	0.05	0	0.05	0	20	0																Cr	0.005	0	0.05	0.005	0.05	10	20	200												Cr	0.029	0	0.05	0.029
	Cd	0	0	0.01	0	0.01	0	100	0																Cd	0.018	0	0.01	0.018	0.01	180	100	18000												Cd	0	0	0.01	0
	Ni	0	0	0.05	0	0.05	0	20	0																Ni	0.01	0	0.05	0.01	0.05	20	20	400												Ni	0	0	0.05	0
	Pb	0	0	0.05	0	0.05	0	20	0																Pb	0.005	0	0.05	0.005	0.05	10	20	200												Pb	0.012	0	0.05	0.012
	V	0	0	0.01	0	0.01	0	100	0																V	0.008	0	0.01	0.008	0.01	80	100	8000												V	0	0	0.01	0
	THC	0	0	0.05	0	0.05	0	20	0																THC	0.07	0	0.05	0.07	0.05	140	20	2800												THC	0.05	0	0.05	0.05
	Σ							315.981	1069.49																Σ							315.981	34425.4												Σ
	WQI								3.38466																WQI								108.948												WQI
		Station 1 Jun.																								Station 2 Jun.																				Station 3 Jun.
		V actual	V ideal	V Standard	V actual - V ideal	V Standard -V ideal	Qi	Wi	WiQi																	V actual	V ideal	V Standard	V actual - V ideal	V Standard -V ideal	Qi	Wi	WiQi													V actual	V ideal	V Standard	V actual - V ideal
	Water Temp	25.9	0	35	25.9	35	74	0.0285714	2.11429																Water Temp	26.1	0	35	26.1	35	74.5714	0.0285714	2.13061												Water Temp	26.1	0	35	26.1
	pH	6.3	7	7.5	0.7	0.5	140	0.133333	18.6667																pH	6.1	7	7.5	0.9	0.5	180	0.133333	24												pH	6.5	7	7.5	0.5
	Col.	4.9	0	15	4.9	15	32.6667	0.0666667	2.17778																Col.	7.8	0	15	7.8	15	52	0.0666667	3.46667												Col.	6.3	0	15	6.3
	Turb.	3.3	0	5	3.3	5	66	0.2	13.2																Turb.	6.2	0	5	6.2	5	124	0.2	24.8												Turb.	5.4	0	5	5.4
	TSS	2.8	0	10	2.8	10	28	0.1	2.8																TSS	8.8	0	10	8.8	10	88	0.1	8.8												TSS	7.7	0	10	7.7
	TDS	52.9	0	500	52.9	500	10.58	0.002	0.02116																TDS	57	0	500	57	500	11.4	0.002	0.0228												TDS	70.2	0	500	70.2
	DO	6.6	14.6	7.5	-8	-7.1	112.676	0.133333	15.0235																DO	6.4	14.6	7.5	-8.2	-7.1	115.493	0.133333	15.3991												DO	6.1	14.6	7.5	-8.5
	BOD5	2.5	0	1	2.5	1	250	1	250																BOD5	3.9	0	1	3.9	1	390	1	390												BOD5	4.4	0	1	4.4
	HCo3	18.8	0	200	18.8	200	9.4	0.005	0.047																HCo3	24.4	0	200	24.4	200	12.2	0.005	0.061												HCo3	45.1	0	200	45.1
	Na	0.59	0	200	0.59	200	0.295	0.005	0.001475																Na	1.05	0	200	1.05	200	0.525	0.005	0.002625												Na	0.83	0	200	0.83
	Cl	12.4	0	200	12.4	200	6.2	0.005	0.031																Cl	20.2	0	200	20.2	200	10.1	0.005	0.0505												Cl	29.1	0	200	29.1
	P	0.71	0	5	0.71	5	14.2	0.2	2.84																P	0.93	0	5	0.93	5	18.6	0.2	3.72												P	1.12	0	5	1.12
	NH4H	0.055	0	1	0.055	1	5.5	1	5.5																NH4H	0.139	0	1	0.139	1	13.9	1	13.9												NH4H	0.082	0	1	0.082
	No2	0.039	0	1	0.039	1	3.9	1	3.9																No2	0.104	0	1	0.104	1	10.4	1	10.4												No2	0.121	0	1	0.121
	NO3	1.32	0	10	1.32	10	13.2	0.1	1.32																NO3	1.84	0	10	1.84	10	18.4	0.1	1.84												NO3	1.61	0	10	1.61
	SO4	0.54	0	500	0.54	500	0.108	0.002	0.000216																SO4	0.77	0	500	0.77	500	0.154	0.002	0.000308												SO4	1.05	0	500	1.05
	Fe	0.52	0	1	0.52	1	52	1	52																Fe	0.74	0	1	0.74	1	74	1	74												Fe	0.81	0	1	0.81
	Mn	0.08	0	0.05	0.08	0.05	160	20	3200																Mn	0.12	0	0.05	0.12	0.05	240	20	4800												Mn	0.1	0	0.05	0.1
	Zn	0.15	0	1	0.15	1	15	1	15																Zn	0.34	0	1	0.34	1	34	1	34												Zn	0.39	0	1	0.39
	Cu	0.009	0	0.1	0.009	0.1	9	10	90																Cu	0.014	0	0.1	0.014	0.1	14	10	140												Cu	0.01	0	0.1	0.01
	Cr	0	0	0.05	0	0.05	0	20	0																Cr	0.011	0	0.05	0.011	0.05	22	20	440												Cr	0.02	0	0.05	0.02
	Cd	0	0	0.01	0	0.01	0	100	0																Cd	0.032	0	0.01	0.032	0.01	320	100	32000												Cd	0.019	0	0.01	0.019
	Ni	0	0	0.05	0	0.05	0	20	0																Ni	0	0	0.05	0	0.05	0	20	0												Ni	0	0	0.05	0
	Pb	0	0	0.05	0	0.05	0	20	0																Pb	0.016	0	0.05	0.016	0.05	32	20	640												Pb	0.022	0	0.05	0.022
	V	0	0	0.01	0	0.01	0	100	0																V	0	0	0.01	0	0.01	0	100	0												V	0	0	0.01	0
	THC	0	0	0.05	0	0.05	0	20	0																THC	0.09	0	0.05	0.09	0.05	180	20	3600												THC	0.08	0	0.05	0.08
	Σ							315.981	3674.64																Σ							315.981	42226.6												Σ
	WQI								11.6293																WQI								133.637												WQI
		Station 1 Jul.																								Station 2 Jul.																				Station 3 Jul.
		V actual	V ideal	V Standard	V actual - V ideal	V Standard -V ideal	Qi	Wi	WiQi																	V actual	V ideal	V Standard	V actual - V ideal	V Standard -V ideal	Qi	Wi	WiQi													V actual	V ideal	V Standard	V actual - V ideal
	Water Temp	24.6	0	35	24.6	35	70.2857	0.0285714	2.00816																Water Temp	24.9	0	35	24.9	35	71.1429	0.0285714	2.03265												Water Temp	27	0	35	27
	pH	5.8	7	7.5	1.2	0.5	240	0.133333	32																pH	5	7	7.5	2	0.5	400	0.133333	53.3333												pH	5.3	7	7.5	1.7
	Col.	5.4	0	15	5.4	15	36	0.0666667	2.4																Col.	5.8	0	15	5.8	15	38.6667	0.0666667	2.57778												Col.	5.5	0	15	5.5
	Turb.	4.1	0	5	4.1	5	82	0.2	16.4																Turb.	3.9	0	5	3.9	5	78	0.2	15.6												Turb.	4.7	0	5	4.7
	TSS	4.5	0	10	4.5	10	45	0.1	4.5																TSS	9.1	0	10	9.1	10	91	0.1	9.1												TSS	9.5	0	10	9.5
	TDS	33.9	0	500	33.9	500	6.78	0.002	0.01356																TDS	64.5	0	500	64.5	500	12.9	0.002	0.0258												TDS	50.1	0	500	50.1
	DO	7.1	14.6	7.5	-7.5	-7.1	105.634	0.133333	14.0845																DO	5.8	14.6	7.5	-8.8	-7.1	123.944	0.133333	16.5258												DO	6.7	14.6	7.5	-7.9
	BOD5	1.6	0	1	1.6	1	160	1	160																BOD5	4.7	0	1	4.7	1	470	1	470												BOD5	3.3	0	1	3.3
	HCo3	12.2	0	200	12.2	200	6.1	0.005	0.0305																HCo3	36.6	0	200	36.6	200	18.3	0.005	0.0915												HCo3	30.5	0	200	30.5
	Na	0.71	0	200	0.71	200	0.355	0.005	0.001775																Na	0.85	0	200	0.85	200	0.425	0.005	0.002125												Na	0.64	0	200	0.64
	Cl	9.4	0	200	9.4	200	4.7	0.005	0.0235																Cl	17.7	0	200	17.7	200	8.85	0.005	0.04425												Cl	11.5	0	200	11.5
	P	0.5	0	5	0.5	5	10	0.2	2																P	0.85	0	5	0.85	5	17	0.2	3.4												P	0.77	0	5	0.77
	NH4H	0.081	0	1	0.081	1	8.1	1	8.1																NH4H	0.293	0	1	0.293	1	29.3	1	29.3												NH4H	0.109	0	1	0.109
	No2	0.09	0	1	0.09	1	9	1	9																No2	0.19	0	1	0.19	1	19	1	19												No2	0.13	0	1	0.13
	NO3	0.74	0	10	0.74	10	7.4	0.1	0.74																NO3	1.01	0	10	1.01	10	10.1	0.1	1.01												NO3	1.24	0	10	1.24
	SO4	0.38	0	500	0.38	500	0.076	0.002	0.000152																SO4	0.85	0	500	0.85	500	0.17	0.002	0.00034												SO4	0.47	0	500	0.47
	Fe	0.34	0	1	0.34	1	34	1	34																Fe	1.22	0	1	1.22	1	122	1	122												Fe	1.1	0	1	1.1
	Mn	0.02	0	0.05	0.02	0.05	40	20	800																Mn	0.25	0	0.05	0.25	0.05	500	20	10000												Mn	0.14	0	0.05	0.14
	Zn	0.1	0	1	0.1	1	10	1	10																Zn	0.59	0	1	0.59	1	59	1	59												Zn	0.44	0	1	0.44
	Cu	0.013	0	0.1	0.013	0.1	13	10	130																Cu	0.026	0	0.1	0.026	0.1	26	10	260												Cu	0.019	0	0.1	0.019
	Cr	0.01	0	0.05	0.01	0.05	20	20	400																Cr	0.038	0	0.05	0.038	0.05	76	20	1520												Cr	0.03	0	0.05	0.03
	Cd	0.017	0	0.01	0.017	0.01	170	100	17000																Cd	0.051	0	0.01	0.051	0.01	510	100	51000												Cd	0.042	0	0.01	0.042
	Ni	0.008	0	0.05	0.008	0.05	16	20	320																Ni	0.024	0	0.05	0.024	0.05	48	20	960												Ni	0.015	0	0.05	0.015
	Pb	0.003	0	0.05	0.003	0.05	6	20	120																Pb	0.031	0	0.05	0.031	0.05	62	20	1240												Pb	0.029	0	0.05	0.029
	V	0.006	0	0.01	0.006	0.01	60	100	6000																V	0.021	0	0.01	0.021	0.01	210	100	21000												V	0.012	0	0.01	0.012
	THC	0.08	0	0.05	0.08	0.05	160	20	3200																THC	0.14	0	0.05	0.14	0.05	280	20	5600												THC	0.11	0	0.05	0.11
	Σ							315.981	28265.3																Σ							315.981	92383												Σ
	WQI								89.4526																WQI								292.369												WQI
		Station 1 Aug.																								Station 2 Aug.																				Station 3 Aug.
		V actual	V ideal	V Standard	V actual - V ideal	V Standard -V ideal	Qi	Wi	WiQi																	V actual	V ideal	V Standard	V actual - V ideal	V Standard -V ideal	Qi	Wi	WiQi													V actual	V ideal	V Standard	V actual - V ideal
	Water Temp	27.2	0	35	27.2	35	77.7143	0.0285714	2.22041																Water Temp	24.9	0	35	24.9	35	71.1429	0.0285714	2.03265												Water Temp	26.7	0	35	26.7
	pH	5.92	7	7.5	1.08	0.5	216	0.133333	28.8																pH	5	7	7.5	2	0.5	400	0.133333	53.3333												pH	6.1	7	7.5	0.9
	Col.	7.1	0	15	7.1	15	47.3333	0.0666667	3.15556																Col.	5.8	0	15	5.8	15	38.6667	0.0666667	2.57778												Col.	10.8	0	15	10.8
	Turb.	6.9	0	5	6.9	5	138	0.2	27.6																Turb.	3.9	0	5	3.9	5	78	0.2	15.6												Turb.	8.3	0	5	8.3
	TSS	9.3	0	10	9.3	10	93	0.1	9.3																TSS	9.1	0	10	9.1	10	91	0.1	9.1												TSS	13.2	0	10	13.2
	TDS	70.4	0	500	70.4	500	14.08	0.002	0.02816																TDS	64.5	0	500	64.5	500	12.9	0.002	0.0258												TDS	93.1	0	500	93.1
	DO	5.4	14.6	7.5	-9.2	-7.1	129.577	0.133333	17.277																DO	5.8	14.6	7.5	-8.8	-7.1	123.944	0.133333	16.5258												DO	5.6	14.6	7.5	-9
	BOD5	2.2	0	1	2.2	1	220	1	220																BOD5	4.7	0	1	4.7	1	470	1	470												BOD5	2.8	0	1	2.8
	HCo3	24.4	0	200	24.4	200	12.2	0.005	0.061																HCo3	36.6	0	200	36.6	200	18.3	0.005	0.0915												HCo3	54.6	0	200	54.6
	Na	0.62	0	200	0.62	200	0.31	0.005	0.00155																Na	0.85	0	200	0.85	200	0.425	0.005	0.002125												Na	1.13	0	200	1.13
	Cl	24.2	0	200	24.2	200	12.1	0.005	0.0605																Cl	17.7	0	200	17.7	200	8.85	0.005	0.04425												Cl	73.2	0	200	73.2
	P	0.74	0	5	0.74	5	14.8	0.2	2.96																P	0.85	0	5	0.85	5	17	0.2	3.4												P	1.25	0	5	1.25
	NH4H	0.105	0	1	0.105	1	10.5	1	10.5																NH4H	0.293	0	1	0.293	1	29.3	1	29.3												NH4H	0.097	0	1	0.097
	No2	0.053	0	1	0.053	1	5.3	1	5.3																No2	0.19	0	1	0.19	1	19	1	19												No2	0.071	0	1	0.071
	NO3	1.85	0	10	1.85	10	18.5	0.1	1.85																NO3	1.01	0	10	1.01	10	10.1	0.1	1.01												NO3	3.1	0	10	3.1
	SO4	0.96	0	500	0.96	500	0.192	0.002	0.000384																SO4	0.85	0	500	0.85	500	0.17	0.002	0.00034												SO4	1.16	0	500	1.16
	Fe	0.51	0	1	0.51	1	51	1	51																Fe	1.22	0	1	1.22	1	122	1	122												Fe	1.9	0	1	1.9
	Mn	0.06	0	0.05	0.06	0.05	120	20	2400																Mn	0.25	0	0.05	0.25	0.05	500	20	10000												Mn	0.21	0	0.05	0.21
	Zn	0.32	0	1	0.32	1	32	1	32																Zn	0.59	0	1	0.59	1	59	1	59												Zn	0.81	0	1	0.81
	Cu	0.029	0	0.1	0.029	0.1	29	10	290																Cu	0.026	0	0.1	0.026	0.1	26	10	260												Cu	0.056	0	0.1	0.056
	Cr	0.017	0	0.05	0.017	0.05	34	20	680																Cr	0.038	0	0.05	0.038	0.05	76	20	1520												Cr	0.049	0	0.05	0.049
	Cd	0.009	0	0.01	0.009	0.01	90	100	9000																Cd	0.051	0	0.01	0.051	0.01	510	100	51000												Cd	0.02	0	0.01	0.02
	Ni	0	0	0.05	0	0.05	0	20	0																Ni	0.024	0	0.05	0.024	0.05	48	20	960												Ni	0.01	0	0.05	0.01
	Pb	0.011	0	0.05	0.011	0.05	22	20	440																Pb	0.031	0	0.05	0.031	0.05	62	20	1240												Pb	0.036	0	0.05	0.036
	V	0	0	0.01	0	0.01	0	100	0																V	0.021	0	0.01	0.021	0.01	210	100	21000												V	0.008	0	0.01	0.008
	THC	0.05	0	0.05	0.05	0.05	100	20	2000																THC	0.14	0	0.05	0.14	0.05	280	20	5600												THC	0.07	0	0.05	0.07
	Σ							315.981	15222.1																Σ							315.981	92383												Σ
	WQI								48.1742																WQI								292.369												WQI
		Station 1 Sept.																								Station 2 Sept.																				Station 3 Sept.
		V actual	V ideal	V Standard	V actual - V ideal	V Standard -V ideal	Qi	Wi	WiQi																	V actual	V ideal	V Standard	V actual - V ideal	V Standard -V ideal	Qi	Wi	WiQi													V actual	V ideal	V Standard	V actual - V ideal
	Water Temp	27	0	35	27	35	77.1429	0.0285714	2.20408																Water Temp	26.7	0	35	26.7	35	76.2857	0.0285714	2.17959												Water Temp	26.5	0	35	26.5
	pH	6.36	7	7.5	0.64	0.5	128	0.133333	17.0667																pH	5.34	7	7.5	1.66	0.5	332	0.133333	44.2667												pH	6.47	7	7.5	0.53
	Col.	10.4	0	15	10.4	15	69.3333	0.0666667	4.62222																Col.	12.7	0	15	12.7	15	84.6667	0.0666667	5.64444												Col.	13.7	0	15	13.7
	Turb.	8.4	0	5	8.4	5	168	0.2	33.6																Turb.	11.4	0	5	11.4	5	228	0.2	45.6												Turb.	10.5	0	5	10.5
	TSS	12.5	0	10	12.5	10	125	0.1	12.5																TSS	15.1	0	10	15.1	10	151	0.1	15.1												TSS	16.3	0	10	16.3
	TDS	82.3	0	500	82.3	500	16.46	0.002	0.03292																TDS	110.3	0	500	110.3	500	22.06	0.002	0.04412												TDS	88.2	0	500	88.2
	DO	6.1	14.6	7.5	-8.5	-7.1	119.718	0.133333	15.9624																DO	4.9	14.6	7.5	-9.7	-7.1	136.62	0.133333	18.216												DO	6.3	14.6	7.5	-8.3
	BOD5	1.7	0	1	1.7	1	170	1	170																BOD5	3.9	0	1	3.9	1	390	1	390												BOD5	2.1	0	1	2.1
	HCo3	17.5	0	200	17.5	200	8.75	0.005	0.04375																HCo3	61	0	200	61	200	30.5	0.005	0.1525												HCo3	33.7	0	200	33.7
	Na	1.26	0	200	1.26	200	0.63	0.005	0.00315																Na	1.2	0	200	1.2	200	0.6	0.005	0.003												Na	1.17	0	200	1.17
	Cl	36.7	0	200	36.7	200	18.35	0.005	0.09175																Cl	85.4	0	200	85.4	200	42.7	0.005	0.2135												Cl	30.9	0	200	30.9
	P	1.26	0	5	1.26	5	25.2	0.2	5.04																P	1.48	0	5	1.48	5	29.6	0.2	5.92												P	2.29	0	5	2.29
	NH4H	0.153	0	1	0.153	1	15.3	1	15.3																NH4H	0.325	0	1	0.325	1	32.5	1	32.5												NH4H	0.186	0	1	0.186
	No2	0.063	0	1	0.063	1	6.3	1	6.3																No2	0.094	0	1	0.094	1	9.4	1	9.4												No2	0.103	0	1	0.103
	NO3	2.48	0	10	2.48	10	24.8	0.1	2.48																NO3	3.42	0	10	3.42	10	34.2	0.1	3.42												NO3	4.18	0	10	4.18
	SO4	0.83	0	500	0.83	500	0.166	0.002	0.000332																SO4	1.54	0	500	1.54	500	0.308	0.002	0.000616												SO4	1.12	0	500	1.12
	Fe	0.84	0	1	0.84	1	84	1	84																Fe	2.43	0	1	2.43	1	243	1	243												Fe	2.23	0	1	2.23
	Mn	0.093	0	0.05	0.093	0.05	186	20	3720																Mn	0.19	0	0.05	0.19	0.05	380	20	7600												Mn	0.157	0	0.05	0.157
	Zn	0.29	0	1	0.29	1	29	1	29																Zn	0.94	0	1	0.94	1	94	1	94												Zn	0.64	0	1	0.64
	Cu	0.033	0	0.1	0.033	0.1	33	10	330																Cu	0.087	0	0.1	0.087	0.1	87	10	870												Cu	0.08	0	0.1	0.08
	Cr	0.012	0	0.05	0.012	0.05	24	20	480																Cr	0.058	0	0.05	0.058	0.05	116	20	2320												Cr	0.03	0	0.05	0.03
	Cd	0.015	0	0.01	0.015	0.01	150	100	15000																Cd	0.028	0	0.01	0.028	0.01	280	100	28000												Cd	0.016	0	0.01	0.016
	Ni	0	0	0.05	0	0.05	0	20	0																Ni	0.019	0	0.05	0.019	0.05	38	20	760												Ni	0	0	0.05	0
	Pb	0.005	0	0.05	0.005	0.05	10	20	200																Pb	0.05	0	0.05	0.05	0.05	100	20	2000												Pb	0.021	0	0.05	0.021
	V	0	0	0.01	0	0.01	0	100	0																V	0.016	0	0.01	0.016	0.01	160	100	16000												V	0	0	0.01	0
	THC	0.09	0	0.05	0.09	0.05	180	20	3600																THC	0.1	0	0.05	0.1	0.05	200	20	4000												THC	0.15	0	0.05	0.15
	Σ							315.981	23728.2																Σ							315.981	62459.7												Σ
	WQI								75.0939																WQI								197.669												WQI
		Station 1 Oct.																								Station 2 Oct.																				Station 3 Oct.
		V actual	V ideal	V Standard	V actual - V ideal	V Standard -V ideal	Qi	Wi	WiQi																	V actual	V ideal	V Standard	V actual - V ideal	V Standard -V ideal	Qi	Wi	WiQi													V actual	V ideal	V Standard	V actual - V ideal
	Water Temp	26.3	0	35	26.3	35	75.1429	0.0285714	2.14694																Water Temp	27.1	0	35	27.1	35	77.4286	0.0285714	2.21224												Water Temp	27.5	0	35	27.5
	pH	6.82	7	7.5	0.18	0.5	36	0.133333	4.8																pH	5.94	7	7.5	1.06	0.5	212	0.133333	28.2667												pH	5.82	7	7.5	1.18
	Col.	6.3	0	15	6.3	15	42	0.0666667	2.8																Col.	8.1	0	15	8.1	15	54	0.0666667	3.6												Col.	7.9	0	15	7.9
	Turb.	4.8	0	5	4.8	5	96	0.2	19.2																Turb.	5.4	0	5	5.4	5	108	0.2	21.6												Turb.	4.1	0	5	4.1
	TSS	6.6	0	10	6.6	10	66	0.1	6.6																TSS	13.5	0	10	13.5	10	135	0.1	13.5												TSS	12.8	0	10	12.8
	TDS	46.7	0	500	46.7	500	9.34	0.002	0.01868																TDS	77	0	500	77	500	15.4	0.002	0.0308												TDS	71.7	0	500	71.7
	DO	6.8	14.6	7.5	-7.8	-7.1	109.859	0.133333	14.6479																DO	5.4	14.6	7.5	-9.2	-7.1	129.577	0.133333	17.277												DO	5.2	14.6	7.5	-9.4
	BOD5	1.9	0	1	1.9	1	190	1	190																BOD5	2.8	0	1	2.8	1	280	1	280												BOD5	2.3	0	1	2.3
	HCo3	12.2	0	200	12.2	200	6.1	0.005	0.0305																HCo3	24.4	0	200	24.4	200	12.2	0.005	0.061												HCo3	24.4	0	200	24.4
	Na	0.52	0	200	0.52	200	0.26	0.005	0.0013																Na	1.07	0	200	1.07	200	0.535	0.005	0.002675												Na	0.85	0	200	0.85
	Cl	7	0	200	7	200	3.5	0.005	0.0175																Cl	21.5	0	200	21.5	200	10.75	0.005	0.05375												Cl	19	0	200	19
	P	0.12	0	5	0.12	5	2.4	0.2	0.48																P	0.33	0	5	0.33	5	6.6	0.2	1.32												P	0.35	0	5	0.35
	NH4H	0.022	0	1	0.022	1	2.2	1	2.2																NH4H	0.07	0	1	0.07	1	7	1	7												NH4H	0.06	0	1	0.06
	No2	0.018	0	1	0.018	1	1.8	1	1.8																No2	0.06	0	1	0.06	1	6	1	6												No2	0.052	0	1	0.052
	NO3	1.36	0	10	1.36	10	13.6	0.1	1.36																NO3	3.31	0	10	3.31	10	33.1	0.1	3.31												NO3	5.04	0	10	5.04
	SO4	0.59	0	500	0.59	500	0.118	0.002	0.000236																SO4	1.13	0	500	1.13	500	0.226	0.002	0.000452												SO4	1.05	0	500	1.05
	Fe	0.19	0	1	0.19	1	19	1	19																Fe	0.57	0	1	0.57	1	57	1	57												Fe	0.33	0	1	0.33
	Mn	0.026	0	0.05	0.026	0.05	52	20	1040																Mn	0.131	0	0.05	0.131	0.05	262	20	5240												Mn	0.084	0	0.05	0.084
	Zn	0.14	0	1	0.14	1	14	1	14																Zn	0.66	0	1	0.66	1	66	1	66												Zn	0.47	0	1	0.47
	Cu	0.01	0	0.1	0.01	0.1	10	10	100																Cu	0.017	0	0.1	0.017	0.1	17	10	170												Cu	0.013	0	0.1	0.013
	Cr	0	0	0.05	0	0.05	0	20	0																Cr	0	0	0.05	0	0.05	0	20	0												Cr	0	0	0.05	0
	Cd	0	0	0.01	0	0.01	0	100	0																Cd	0	0	0.01	0	0.01	0	100	0												Cd	0	0	0.01	0
	Ni	0	0	0.05	0	0.05	0	20	0																Ni	0	0	0.05	0	0.05	0	20	0												Ni	0	0	0.05	0
	Pb	0	0	0.05	0	0.05	0	20	0																Pb	0	0	0.05	0	0.05	0	20	0												Pb	0	0	0.05	0
	V	0	0	0.01	0	0.01	0	100	0																V	0	0	0.01	0	0.01	0	100	0												V	0	0	0.01	0
	THC	0.03	0	0.05	0.03	0.05	60	20	1200																THC	0.07	0	0.05	0.07	0.05	140	20	2800												THC	0.05	0	0.05	0.05
	Σ							315.981	2619.1																Σ							315.981	8717.23												Σ
	WQI								8.2888																WQI								27.5879												WQI
		Station 1 Nov.																								Station 2 Nov.																				Station 3 Nov.
		V actual	V ideal	V Standard	V actual - V ideal	V Standard -V ideal	Qi	Wi	WiQi																	V actual	V ideal	V Standard	V actual - V ideal	V Standard -V ideal	Qi	Wi	WiQi													V actual	V ideal	V Standard	V actual - V ideal
	Water Temp	27.2	0	35	27.2	35	77.7143	0.0285714	2.22041																Water Temp	27.1	0	35	27.1	35	77.4286	0.0285714	2.21224												Water Temp	27.2	0	35	27.2
	pH	4.94	7	7.5	2.06	0.5	412	0.133333	54.9333																pH	5.94	7	7.5	1.06	0.5	212	0.133333	28.2667												pH	4.84	7	7.5	2.16
	Col.	2.8	0	15	2.8	15	18.6667	0.0666667	1.24444																Col.	8.1	0	15	8.1	15	54	0.0666667	3.6												Col.	3.7	0	15	3.7
	Turb.	2.1	0	5	2.1	5	42	0.2	8.4																Turb.	5.4	0	5	5.4	5	108	0.2	21.6												Turb.	3.3	0	5	3.3
	TSS	5.3	0	10	5.3	10	53	0.1	5.3																TSS	13.5	0	10	13.5	10	135	0.1	13.5												TSS	4.2	0	10	4.2
	TDS	90.6	0	500	90.6	500	18.12	0.002	0.03624																TDS	77	0	500	77	500	15.4	0.002	0.0308												TDS	125.5	0	500	125.5
	DO	6.5	14.6	7.5	-8.1	-7.1	114.085	0.133333	15.2113																DO	5.4	14.6	7.5	-9.2	-7.1	129.577	0.133333	17.277												DO	6.2	14.6	7.5	-8.4
	BOD5	2.9	0	1	2.9	1	290	1	290																BOD5	2.8	0	1	2.8	1	280	1	280												BOD5	3.8	0	1	3.8
	HCo3	54.2	0	200	54.2	200	27.1	0.005	0.1355																HCo3	24.4	0	200	24.4	200	12.2	0.005	0.061												HCo3	58.4	0	200	58.4
	Na	1.82	0	200	1.82	200	0.91	0.005	0.00455																Na	1.07	0	200	1.07	200	0.535	0.005	0.002675												Na	1.95	0	200	1.95
	Cl	73.2	0	200	73.2	200	36.6	0.005	0.183																Cl	21.5	0	200	21.5	200	10.75	0.005	0.05375												Cl	126.9	0	200	126.9
	P	1.3	0	5	1.3	5	26	0.2	5.2																P	0.33	0	5	0.33	5	6.6	0.2	1.32												P	2.54	0	5	2.54
	NH4H	0.153	0	1	0.153	1	15.3	1	15.3																NH4H	0.07	0	1	0.07	1	7	1	7												NH4H	0.275	0	1	0.275
	No2	0.072	0	1	0.072	1	7.2	1	7.2																No2	0.06	0	1	0.06	1	6	1	6												No2	0.084	0	1	0.084
	NO3	2.38	0	10	2.38	10	23.8	0.1	2.38																NO3	3.31	0	10	3.31	10	33.1	0.1	3.31												NO3	4.91	0	10	4.91
	SO4	1.49	0	500	1.49	500	0.298	0.002	0.000596																SO4	1.13	0	500	1.13	500	0.226	0.002	0.000452												SO4	1.84	0	500	1.84
	Fe	0.99	0	1	0.99	1	99	1	99																Fe	0.57	0	1	0.57	1	57	1	57												Fe	3.73	0	1	3.73
	Mn	0.17	0	0.05	0.17	0.05	340	20	6800																Mn	0.131	0	0.05	0.131	0.05	262	20	5240												Mn	0.18	0	0.05	0.18
	Zn	0.52	0	1	0.52	1	52	1	52																Zn	0.66	0	1	0.66	1	66	1	66												Zn	1.29	0	1	1.29
	Cu	0.08	0	0.1	0.08	0.1	80	10	800																Cu	0.017	0	0.1	0.017	0.1	17	10	170												Cu	0.09	0	0.1	0.09
	Cr	0.018	0	0.05	0.018	0.05	36	20	720																Cr	0	0	0.05	0	0.05	0	20	0												Cr	0.046	0	0.05	0.046
	Cd	0.035	0	0.01	0.035	0.01	350	100	35000																Cd	0	0	0.01	0	0.01	0	100	0												Cd	0.022	0	0.01	0.022
	Ni	0.004	0	0.05	0.004	0.05	8	20	160																Ni	0	0	0.05	0	0.05	0	20	0												Ni	0.016	0	0.05	0.016
	Pb	0	0	0.05	0	0.05	0	20	0																Pb	0	0	0.05	0	0.05	0	20	0												Pb	0.05	0	0.05	0.05
	V	0.003	0	0.01	0.003	0.01	30	100	3000																V	0	0	0.01	0	0.01	0	100	0												V	0.01	0	0.01	0.01
	THC	0.02	0	0.05	0.02	0.05	40	20	800																THC	0.07	0	0.05	0.07	0.05	140	20	2800												THC	0.09	0	0.05	0.09
	Σ							315.981	47838.7																Σ							315.981	8717.23												Σ
	WQI								151.398																WQI								27.5879												WQI
		Station 1 Dec.																								Station 2 Dec.																				Station 3 Dec.
		V actual	V ideal	V Standard	V actual - V ideal	V Standard -V ideal	Qi	Wi	WiQi																	V actual	V ideal	V Standard	V actual - V ideal	V Standard -V ideal	Qi	Wi	WiQi													V actual	V ideal	V Standard	V actual - V ideal
	Water Temp	27.2	0	35	27.2	35	77.7143	0.0285714	2.22041																Water Temp	27.5	0	35	27.5	35	78.5714	0.0285714	2.2449												Water Temp	27.7	0	35	27.7
	pH	4.94	7	7.5	2.06	0.5	412	0.133333	54.9333																pH	5.22	7	7.5	1.78	0.5	356	0.133333	47.4667												pH	6.1	7	7.5	0.9
	Col.	2.8	0	15	2.8	15	18.6667	0.0666667	1.24444																Col.	2.3	0	15	2.3	15	15.3333	0.0666667	1.02222												Col.	1.9	0	15	1.9
	Turb.	2.1	0	5	2.1	5	42	0.2	8.4																Turb.	1.8	0	5	1.8	5	36	0.2	7.2												Turb.	1.1	0	5	1.1
	TSS	5.3	0	10	5.3	10	53	0.1	5.3																TSS	9.1	0	10	9.1	10	91	0.1	9.1												TSS	5.8	0	10	5.8
	TDS	90.6	0	500	90.6	500	18.12	0.002	0.03624																TDS	94.5	0	500	94.5	500	18.9	0.002	0.0378												TDS	96.5	0	500	96.5
	DO	6.5	14.6	7.5	-8.1	-7.1	114.085	0.133333	15.2113																DO	5.4	14.6	7.5	-9.2	-7.1	129.577	0.133333	17.277												DO	5.7	14.6	7.5	-8.9
	BOD5	2.9	0	1	2.9	1	290	1	290																BOD5	3.7	0	1	3.7	1	370	1	370												BOD5	2.6	0	1	2.6
	HCo3	54.2	0	200	54.2	200	27.1	0.005	0.1355																HCo3	34.6	0	200	34.6	200	17.3	0.005	0.0865												HCo3	28.1	0	200	28.1
	Na	1.82	0	200	1.82	200	0.91	0.005	0.00455																Na	0.81	0	200	0.81	200	0.405	0.005	0.002025												Na	0.77	0	200	0.77
	Cl	73.2	0	200	73.2	200	36.6	0.005	0.183																Cl	34.1	0	200	34.1	200	17.05	0.005	0.08525												Cl	29.6	0	200	29.6
	P	1.3	0	5	1.3	5	26	0.2	5.2																P	0.79	0	5	0.79	5	15.8	0.2	3.16												P	0.81	0	5	0.81
	NH4H	0.153	0	1	0.153	1	15.3	1	15.3																NH4H	0.121	0	1	0.121	1	12.1	1	12.1												NH4H	0.108	0	1	0.108
	No2	0.072	0	1	0.072	1	7.2	1	7.2																No2	0.061	0	1	0.061	1	6.1	1	6.1												No2	0.077	0	1	0.077
	NO3	2.38	0	10	2.38	10	23.8	0.1	2.38																NO3	2.86	0	10	2.86	10	28.6	0.1	2.86												NO3	1.9	0	10	1.9
	SO4	1.49	0	500	1.49	500	0.298	0.002	0.000596																SO4	0.91	0	500	0.91	500	0.182	0.002	0.000364												SO4	0.68	0	500	0.68
	Fe	0.99	0	1	0.99	1	99	1	99																Fe	2.27	0	1	2.27	1	227	1	227												Fe	1.16	0	1	1.16
	Mn	0.17	0	0.05	0.17	0.05	340	20	6800																Mn	0.15	0	0.05	0.15	0.05	300	20	6000												Mn	0.07	0	0.05	0.07
	Zn	0.52	0	1	0.52	1	52	1	52																Zn	0.61	0	1	0.61	1	61	1	61												Zn	0.72	0	1	0.72
	Cu	0.08	0	0.1	0.08	0.1	80	10	800																Cu	0.094	0	0.1	0.094	0.1	94	10	940												Cu	0.083	0	0.1	0.083
	Cr	0.018	0	0.05	0.018	0.05	36	20	720																Cr	0.015	0	0.05	0.015	0.05	30	20	600												Cr	0.006	0	0.05	0.006
	Cd	0.035	0	0.01	0.035	0.01	350	100	35000																Cd	0.009	0	0.01	0.009	0.01	90	100	9000												Cd	0	0	0.01	0
	Ni	0.004	0	0.05	0.004	0.05	8	20	160																Ni	0	0	0.05	0	0.05	0	20	0												Ni	0	0	0.05	0
	Pb	0	0	0.05	0	0.05	0	20	0																Pb	0.017	0	0.05	0.017	0.05	34	20	680												Pb	0.014	0	0.05	0.014
	V	0.003	0	0.01	0.003	0.01	30	100	3000																V	0	0	0.01	0	0.01	0	100	0												V	0	0	0.01	0
	THC	0.02	0	0.05	0.02	0.05	40	20	800																THC	0.09	0	0.05	0.09	0.05	180	20	3600												THC	0.05	0	0.05	0.05
	Σ							315.981	47838.7																Σ							315.981	21586.7												Σ
	WQI								151.398																WQI								68.3166												WQI
		Station 1 Jan.																								Station 2 Jan.																				Station 3 Jan.
		V actual	V ideal	V Standard	V actual - V ideal	V Standard -V ideal	Qi	Wi	WiQi																	V actual	V ideal	V Standard	V actual - V ideal	V Standard -V ideal	Qi	Wi	WiQi													V actual	V ideal	V Standard	V actual - V ideal
	Water Temp	27	0	35	27	35	77.1429	0.0285714	2.20408																Water Temp	26.5	0	35	26.5	35	75.7143	0.0285714	2.16327												Water Temp	28	0	35	28
	pH	5.32	7	7.5	1.68	0.5	336	0.133333	44.8																pH	5.91	7	7.5	1.09	0.5	218	0.133333	29.0667												pH	5.47	7	7.5	1.53
	Col.	4.7	0	15	4.7	15	31.3333	0.0666667	2.08889																Col.	5.1	0	15	5.1	15	34	0.0666667	2.26667												Col.	5.9	0	15	5.9
	Turb.	3.9	0	5	3.9	5	78	0.2	15.6																Turb.	4.8	0	5	4.8	5	96	0.2	19.2												Turb.	5.1	0	5	5.1
	TSS	5.9	0	10	5.9	10	59	0.1	5.9																TSS	7	0	10	7	10	70	0.1	7												TSS	7.8	0	10	7.8
	TDS	76.1	0	500	76.1	500	15.22	0.002	0.03044																TDS	105.6	0	500	105.6	500	21.12	0.002	0.04224												TDS	115.5	0	500	115.5
	DO	6.3	14.6	7.5	-8.3	-7.1	116.901	0.133333	15.5869																DO	6.9	14.6	7.5	-7.7	-7.1	108.451	0.133333	14.4601												DO	5.4	14.6	7.5	-9.2
	BOD5	2.3	0	1	2.3	1	230	1	230																BOD5	2.6	0	1	2.6	1	260	1	260												BOD5	4.2	0	1	4.2
	HCo3	18.6	0	200	18.6	200	9.3	0.005	0.0465																HCo3	46.7	0	200	46.7	200	23.35	0.005	0.11675												HCo3	59.2	0	200	59.2
	Na	1.37	0	200	1.37	200	0.685	0.005	0.003425																Na	1.58	0	200	1.58	200	0.79	0.005	0.00395												Na	1.92	0	200	1.92
	Cl	38.5	0	200	38.5	200	19.25	0.005	0.09625																Cl	59.2	0	200	59.2	200	29.6	0.005	0.148												Cl	73.4	0	200	73.4
	P	1.25	0	5	1.25	5	25	0.2	5																P	2.4	0	5	2.4	5	48	0.2	9.6												P	3.17	0	5	3.17
	NH4H	0.136	0	1	0.136	1	13.6	1	13.6																NH4H	0.274	0	1	0.274	1	27.4	1	27.4												NH4H	0.392	0	1	0.392
	No2	0.073	0	1	0.073	1	7.3	1	7.3																No2	0.092	0	1	0.092	1	9.2	1	9.2												No2	0.142	0	1	0.142
	NO3	1.83	0	10	1.83	10	18.3	0.1	1.83																NO3	4.2	0	10	4.2	10	42	0.1	4.2												NO3	5.1	0	10	5.1
	SO4	0.65	0	500	0.65	500	0.13	0.002	0.00026																SO4	1.33	0	500	1.33	500	0.266	0.002	0.000532												SO4	1.42	0	500	1.42
	Fe	1.85	0	1	1.85	1	185	1	185																Fe	3.29	0	1	3.29	1	329	1	329												Fe	4.12	0	1	4.12
	Mn	0.12	0	0.05	0.12	0.05	240	20	4800																Mn	0.19	0	0.05	0.19	0.05	380	20	7600												Mn	0.22	0	0.05	0.22
	Zn	0.55	0	1	0.55	1	55	1	55																Zn	0.92	0	1	0.92	1	92	1	92												Zn	1.16	0	1	1.16
	Cu	0.09	0	0.1	0.09	0.1	90	10	900																Cu	0.13	0	0.1	0.13	0.1	130	10	1300												Cu	0.18	0	0.1	0.18
	Cr	0.048	0	0.05	0.048	0.05	96	20	1920																Cr	0.126	0	0.05	0.126	0.05	252	20	5040												Cr	0.184	0	0.05	0.184
	Cd	0.035	0	0.01	0.035	0.01	350	100	35000																Cd	0.081	0	0.01	0.081	0.01	810	100	81000												Cd	0.154	0	0.01	0.154
	Ni	0.015	0	0.05	0.015	0.05	30	20	600																Ni	0.038	0	0.05	0.038	0.05	76	20	1520												Ni	0.041	0	0.05	0.041
	Pb	0.083	0	0.05	0.083	0.05	166	20	3320																Pb	0.121	0	0.05	0.121	0.05	242	20	4840												Pb	0.172	0	0.05	0.172
	V	0.012	0	0.01	0.012	0.01	120	100	12000																V	0.024	0	0.01	0.024	0.01	240	100	24000												V	0.039	0	0.01	0.039
	THC	0.08	0	0.05	0.08	0.05	160	20	3200																THC	0.17	0	0.05	0.17	0.05	340	20	6800												THC	0.24	0	0.05	0.24
	Σ							315.981	62324.1																Σ							315.981	132906												Σ
	WQI								197.24																WQI								420.614												WQI
		Station 1 Feb.																								Station 2 Feb.																				Station 3 Feb.
		V actual	V ideal	V Standard	V actual - V ideal	V Standard -V ideal	Qi	Wi	WiQi																	V actual	V ideal	V Standard	V actual - V ideal	V Standard -V ideal	Qi	Wi	WiQi													V actual	V ideal	V Standard	V actual - V ideal
	Water Temp	25.8	0	35	25.8	35	73.7143	0.0285714	2.10612																Water Temp	27.1	0	35	27.1	35	77.4286	0.0285714	2.21224												Water Temp	27.3	0	35	27.3
	pH	5.83	7	7.5	1.17	0.5	234	0.133333	31.2																pH	5.72	7	7.5	1.28	0.5	256	0.133333	34.1333												pH	5.85	7	7.5	1.15
	Col.	2.1	0	15	2.1	15	14	0.0666667	0.933333																Col.	2.9	0	15	2.9	15	19.3333	0.0666667	1.28889												Col.	1.7	0	15	1.7
	Turb.	1.3	0	5	1.3	5	26	0.2	5.2																Turb.	1.8	0	5	1.8	5	36	0.2	7.2												Turb.	1.1	0	5	1.1
	TSS	3.6	0	10	3.6	10	36	0.1	3.6																TSS	4.7	0	10	4.7	10	47	0.1	4.7												TSS	2.8	0	10	2.8
	TDS	47.9	0	500	47.9	500	9.58	0.002	0.01916																TDS	74	0	500	74	500	14.8	0.002	0.0296												TDS	66.5	0	500	66.5
	DO	5.7	14.6	7.5	-8.9	-7.1	125.352	0.133333	16.7136																DO	5.3	14.6	7.5	-9.3	-7.1	130.986	0.133333	17.4648												DO	6.1	14.6	7.5	-8.5
	BOD5	1.9	0	1	1.9	1	190	1	190																BOD5	2.3	0	1	2.3	1	230	1	230												BOD5	2.1	0	1	2.1
	HCo3	12.2	0	200	12.2	200	6.1	0.005	0.0305																HCo3	36.6	0	200	36.6	200	18.3	0.005	0.0915												HCo3	30.5	0	200	30.5
	Na	0.84	0	200	0.84	200	0.42	0.005	0.0021																Na	1.11	0	200	1.11	200	0.555	0.005	0.002775												Na	0.95	0	200	0.95
	Cl	15.3	0	200	15.3	200	7.65	0.005	0.03825																Cl	19	0	200	19	200	9.5	0.005	0.0475												Cl	14.1	0	200	14.1
	P	0.33	0	5	0.33	5	6.6	0.2	1.32																P	0.61	0	5	0.61	5	12.2	0.2	2.44												P	0.74	0	5	0.74
	NH4H	0.023	0	1	0.023	1	2.3	1	2.3																NH4H	0.051	0	1	0.051	1	5.1	1	5.1												NH4H	0.059	0	1	0.059
	No2	0.018	0	1	0.018	1	1.8	1	1.8																No2	0.037	0	1	0.037	1	3.7	1	3.7												No2	0.02	0	1	0.02
	NO3	0.94	0	10	0.94	10	9.4	0.1	0.94																NO3	1.51	0	10	1.51	10	15.1	0.1	1.51												NO3	1.3	0	10	1.3
	SO4	0.27	0	500	0.27	500	0.054	0.002	0.000108																SO4	0.63	0	500	0.63	500	0.126	0.002	0.000252												SO4	0.54	0	500	0.54
	Fe	0.49	0	1	0.49	1	49	1	49																Fe	0.95	0	1	0.95	1	95	1	95												Fe	0.76	0	1	0.76
	Mn	0.058	0	0.05	0.058	0.05	116	20	2320																Mn	0.074	0	0.05	0.074	0.05	148	20	2960												Mn	0.091	0	0.05	0.091
	Zn	0.13	0	1	0.13	1	13	1	13																Zn	0.38	0	1	0.38	1	38	1	38												Zn	0.2	0	1	0.2
	Cu	0.029	0	0.1	0.029	0.1	29	10	290																Cu	0.053	0	0.1	0.053	0.1	53	10	530												Cu	0.062	0	0.1	0.062
	Cr	0	0	0.05	0	0.05	0	20	0																Cr	0.025	0	0.05	0.025	0.05	50	20	1000												Cr	0.01	0	0.05	0.01
	Cd	0.009	0	0.01	0.009	0.01	90	100	9000																Cd	0.019	0	0.01	0.019	0.01	190	100	19000												Cd	0.013	0	0.01	0.013
	Ni	0	0	0.05	0	0.05	0	20	0																Ni	0	0	0.05	0	0.05	0	20	0												Ni	0	0	0.05	0
	Pb	0.017	0	0.05	0.017	0.05	34	20	680																Pb	0.038	0	0.05	0.038	0.05	76	20	1520												Pb	0.024	0	0.05	0.024
	V	0	0	0.01	0	0.01	0	100	0																V	0	0	0.01	0	0.01	0	100	0												V	0	0	0.01	0
	THC	0.02	0	0.05	0.02	0.05	40	20	800																THC	0.09	0	0.05	0.09	0.05	180	20	3600												THC	0.07	0	0.05	0.07
	Σ							315.981	13408.2																Σ							315.981	29052.9												Σ
	WQI								42.4336																WQI								91.9452												WQI
		V actual	V ideal	V Standard	V actual - V ideal	V Standard -V ideal	Qi	Wi	WiQi																	V actual	V ideal	V Standard	V actual - V ideal	V Standard -V ideal	Qi	Wi	WiQi													V actual	V ideal	V Standard	V actual - V ideal
	Water Temp	25.6	0	35	25.6	35	73.1429	0.0285714	2.0898																Water Temp	27	0	35	27	35	77.1429	0.0285714	2.20408												Water Temp	26.5	0	35	26.5
	pH	5.75	7	7.5	1.25	0.5	250	0.133333	33.3333																pH	5.68	7	7.5	1.32	0.5	264	0.133333	35.2												pH	5.54	7	7.5	1.46
	Col.	3.7	0	15	3.7	15	24.6667	0.0666667	1.64444																Col.	5.03	0	15	5.03	15	33.5333	0.0666667	2.23556												Col.	5.5	0	15	5.5
	Turb.	3.03	0	5	3.03	5	60.6	0.2	12.12																Turb.	4.4	0	5	4.4	5	88	0.2	17.6												Turb.	3.97	0	5	3.97
	TSS	4.97	0	10	4.97	10	49.7	0.1	4.97																TSS	6.4	0	10	6.4	10	64	0.1	6.4												TSS	6.3	0	10	6.3
	TDS	55.26	0	500	55.26	500	11.052	0.002	0.022104																TDS	89.23	0	500	89.23	500	17.846	0.002	0.035692												TDS	85.27	0	500	85.27
	DO	6.23	14.6	7.5	-8.37	-7.1	117.887	0.133333	15.7183																DO	5.83	14.6	7.5	-8.77	-7.1	123.521	0.133333	16.4695												DO	5.47	14.6	7.5	-9.13
	BOD5	2.37	0	1	2.37	1	237	1	237																BOD5	2.7	0	1	2.7	1	270	1	270												BOD5	3.27	0	1	3.27
	HCo3	22.45	0	200	22.45	200	11.225	0.005	0.056125																HCo3	42.03	0	200	42.03	200	21.015	0.005	0.105075												HCo3	48.07	0	200	48.07
	Na	0.91	0	200	0.91	200	0.455	0.005	0.002275																Na	1.18	0	200	1.18	200	0.59	0.005	0.00295												Na	1.27	0	200	1.27
	Cl	23.83	0	200	23.83	200	11.915	0.005	0.059575																Cl	31.13	0	200	31.13	200	15.565	0.005	0.077825												Cl	33.8	0	200	33.8
	P	0.59	0	5	0.59	5	11.8	0.2	2.36																P	1.2	0	5	1.2	5	24	0.2	4.8												P	1.56	0	5	1.56
	NH4H	0.11	0	1	0.11	1	11	1	11																NH4H	0.22	0	1	0.22	1	22	1	22												NH4H	0.35	0	1	0.35
	No2	0.07	0	1	0.07	1	7	1	7																No2	0.27	0	1	0.27	1	27	1	27												No2	0.29	0	1	0.29
	NO3	1.55	0	10	1.55	10	15.5	0.1	1.55																NO3	2.99	0	10	2.99	10	29.9	0.1	2.99												NO3	3.32	0	10	3.32
	SO4	0.41	0	500	0.41	500	0.082	0.002	0.000164																SO4	0.83	0	500	0.83	500	0.166	0.002	0.000332												SO4	0.86	0	500	0.86
	Fe	0.95	0	1	0.95	1	95	1	95																Fe	1.69	0	1	1.69	1	169	1	169												Fe	1.94	0	1	1.94
	Mn	0.073	0	0.05	0.073	0.05	146	20	2920																Mn	0.11	0	0.05	0.11	0.05	220	20	4400												Mn	0.13	0	0.05	0.13
	Zn	0.3	0	1	0.3	1	30	1	30																Zn	0.59	0	1	0.59	1	59	1	59												Zn	0.62	0	1	0.62
	Cu	0.04	0	0.1	0.04	0.1	40	10	400																Cu	0.08	0	0.1	0.08	0.1	80	10	800												Cu	0.1	0	0.1	0.1
	Cr	0.02	0	0.05	0.02	0.05	40	20	800																Cr	0.06	0	0.05	0.06	0.05	120	20	2400												Cr	0.07	0	0.05	0.07
	Cd	0.02	0	0.01	0.02	0.01	200	100	20000																Cd	0.04	0	0.01	0.04	0.01	400	100	40000												Cd	0.07	0	0.01	0.07
	Ni	0.005	0	0.05	0.005	0.05	10	20	200																Ni	0.025	0	0.05	0.025	0.05	50	20	1000												Ni	0.031	0	0.05	0.031
	Pb	0.037	0	0.05	0.037	0.05	74	20	1480																Pb	0.056	0	0.05	0.056	0.05	112	20	2240												Pb	0.07	0	0.05	0.07
	V	0.004	0	0.01	0.004	0.01	40	100	4000																V	0.019	0	0.01	0.019	0.01	190	100	19000												V	0.029	0	0.01	0.029
	THC	0.05	0	0.05	0.05	0.05	100	20	2000																THC	0.13	0	0.05	0.13	0.05	260	20	5200												THC	0.14	0	0.05	0.14
	Σ							315.981	32253.9																Σ							315.981	75675.1												Σ
	WQI								102.076																WQI								239.493												WQI
		V actual	V ideal	V Standard	V actual - V ideal	V Standard -V ideal	Qi	Wi	WiQi																	V actual	V ideal	V Standard	V actual - V ideal	V Standard -V ideal	Qi	Wi	WiQi													V actual	V ideal	V Standard	V actual - V ideal
	Water Temp	26.9	0	35	26.9	35	76.8571	0.0285714	2.19592																Water Temp	27	0	35	27	35	77.1429	0.0285714	2.20408												Water Temp	26.9	0	35	26.9
	pH	5.61667	7	7.5	1.38333	0.5	276.667	0.133333	36.8889																pH	5.52667	7	7.5	1.47333	0.5	294.667	0.133333	39.2889												pH	5.48	7	7.5	1.52
	Col.	4.13333	0	15	4.13333	15	27.5556	0.0666667	1.83704																Col.	4.91	0	15	4.91	15	32.7333	0.0666667	2.18222												Col.	5.53333	0	15	5.53333
	Turb.	3.41	0	5	3.41	5	68.2	0.2	13.64																Turb.	4.1	0	5	4.1	5	82	0.2	16.4												Turb.	4.69	0	5	4.69
	TSS	5.39	0	10	5.39	10	53.9	0.1	5.39																TSS	6.06667	0	10	6.06667	10	60.6667	0.1	6.06667												TSS	6.56667	0	10	6.56667
	TDS	55.02	0	500	55.02	500	11.004	0.002	0.022008																TDS	79.5433	0	500	79.5433	500	15.9087	0.002	0.0318173												TDS	73.1233	0	500	73.1233
	DO	5.97667	14.6	7.5	-8.62333	-7.1	121.455	0.133333	16.1941																DO	5.31	14.6	7.5	-9.29	-7.1	130.845	0.133333	17.446												DO	5.09	14.6	7.5	-9.51
	BOD5	2.49	0	1	2.49	1	249	1	249																BOD5	3.26667	0	1	3.26667	1	326.667	1	326.667												BOD5	2.72333	0	1	2.72333
	HCo3	17.65	0	200	17.65	200	8.825	0.005	0.044125																HCo3	42.4767	0	200	42.4767	200	21.2383	0.005	0.106192												HCo3	34.3567	0	200	34.3567
	Na	0.67	0	200	0.67	200	0.335	0.005	0.001675																Na	0.823333	0	200	0.823333	200	0.411667	0.005	0.00205833												Na	0.863333	0	200	0.863333
	Cl	15.2767	0	200	15.2767	200	7.63833	0.005	0.0381917																Cl	28.0433	0	200	28.0433	200	14.0217	0.005	0.0701083												Cl	25	0	200	25
	P	0.476667	0	5	0.476667	5	9.53333	0.2	1.90667																P	0.7	0	5	0.7	5	14	0.2	2.8												P	0.953333	0	5	0.953333
	NH4H	0.0733333	0	1	0.0733333	1	7.33333	1	7.33333																NH4H	0.17	0	1	0.17	1	17	1	17												NH4H	0.176333	0	1	0.176333
	No2	0.0393333	0	1	0.0393333	1	3.93333	1	3.93333																No2	0.128667	0	1	0.128667	1	12.8667	1	12.8667												No2	0.128333	0	1	0.128333
	NO3	1.43333	0	10	1.43333	10	14.3333	0.1	1.43333																NO3	1.74667	0	10	1.74667	10	17.4667	0.1	1.74667												NO3	1.91667	0	10	1.91667
	SO4	0.503333	0	500	0.503333	500	0.100667	0.002	0.000201333																SO4	0.84	0	500	0.84	500	0.168	0.002	0.000336												SO4	0.8	0	500	0.8
	Fe	0.536667	0	1	0.536667	1	53.6667	1	53.6667																Fe	1.19667	0	1	1.19667	1	119.667	1	119.667												Fe	0.953333	0	1	0.953333
	Mn	0.0463333	0	0.05	0.0463333	0.05	92.6667	20	1853.33																Mn	0.0876667	0	0.05	0.0876667	0.05	175.333	20	3506.67												Mn	0.061	0	0.05	0.061
	Zn	0.186667	0	1	0.186667	1	18.6667	1	18.6667																Zn	0.45	0	1	0.45	1	45	1	45												Zn	0.346667	0	1	0.346667
	Cu	0.032	0	0.1	0.032	0.1	32	10	320																Cu	0.0493333	0	0.1	0.0493333	0.1	49.3333	10	493.333												Cu	0.056	0	0.1	0.056
	Cr	0.01	0	0.05	0.01	0.05	20	20	400																Cr	0.029	0	0.05	0.029	0.05	58	20	1160												Cr	0.038	0	0.05	0.038
	Cd	0.00866667	0	0.01	0.00866667	0.01	86.6667	100	8666.67																Cd	0.0306667	0	0.01	0.0306667	0.01	306.667	100	30666.7												Cd	0.0316667	0	0.01	0.0316667
	Ni	0.00166667	0	0.05	0.00166667	0.05	3.33333	20	66.6667																Ni	0.0116667	0	0.05	0.0116667	0.05	23.3333	20	466.667												Ni	0.0103333	0	0.05	0.0103333
	Pb	0.0186667	0	0.05	0.0186667	0.05	37.3333	20	746.667																Pb	0.0323333	0	0.05	0.0323333	0.05	64.6667	20	1293.33												Pb	0.0366667	0	0.05	0.0366667
	V	0.00133333	0	0.01	0.00133333	0.01	13.3333	100	1333.33																V	0.009	0	0.01	0.009	0.01	90	100	9000												V	0.00966667	0	0.01	0.00966667
	THC	0.0366667	0	0.05	0.0366667	0.05	73.3333	20	1466.67																THC	0.0966667	0	0.05	0.0966667	0.05	193.333	20	3866.67												THC	0.07	0	0.05	0.07
	Σ							315.981	15265.5																Σ							315.981	51062.9												Σ
	WQI								48.3115																WQI								161.601												WQI
		V actual	V ideal	V Standard	V actual - V ideal	V Standard -V ideal	Qi	Wi	WiQi																	V actual	V ideal	V Standard	V actual - V ideal	V Standard -V ideal	Qi	Wi	WiQi													V actual	V ideal	V Standard	V actual - V ideal
	Water Temp	24.8	0	35	24.8	35	70.8571	0.0285714	2.02449																Water Temp	27.2	0	35	27.2	35	77.7143	0.0285714	2.22041												Water Temp	27.7	0	35	27.7
	pH	5.90556	7	7.5	1.09444	0.5	218.889	0.133333	29.1852																pH	5.54222	7	7.5	1.45778	0.5	291.556	0.133333	38.8741												pH	5.72667	7	7.5	1.27333
	Col.	4.07778	0	15	4.07778	15	27.1852	0.0666667	1.81235																Col.	5.60333	0	15	5.60333	15	37.3556	0.0666667	2.49037												Col.	5.61111	0	15	5.61111
	Turb.	3.07	0	5	3.07	5	61.4	0.2	12.28																Turb.	4.66667	0	5	4.66667	5	93.3333	0.2	18.6667												Turb.	4.79667	0	5	4.79667
	TSS	4.36333	0	10	4.36333	10	43.6333	0.1	4.36333																TSS	7.02222	0	10	7.02222	10	70.2222	0.1	7.02222												TSS	6.82222	0	10	6.82222
	TDS	52.0733	0	500	52.0733	500	10.4147	0.002	0.0208293																TDS	71.3811	0	500	71.3811	500	14.2762	0.002	0.0285524												TDS	72.8411	0	500	72.8411
	DO	6.25889	14.6	7.5	-8.34111	-7.1	117.48	0.133333	15.6641																DO	5.67	14.6	7.5	-8.93	-7.1	125.775	0.133333	16.77												DO	5.09667	14.6	7.5	-9.50333
	BOD5	2.29667	0	1	2.29667	1	229.667	1	229.667																BOD5	3.48889	0	1	3.48889	1	348.889	1	348.889												BOD5	3.10778	0	1	3.10778
	HCo3	16.2167	0	200	16.2167	200	8.10833	0.005	0.0405417																HCo3	34.4922	0	200	34.4922	200	17.2461	0.005	0.0862306												HCo3	34.6189	0	200	34.6189
	Na	0.573333	0	200	0.573333	200	0.286667	0.005	0.00143333																Na	0.857778	0	200	0.857778	200	0.428889	0.005	0.00214444												Na	0.747778	0	200	0.747778
	Cl	12.4256	0	200	12.4256	200	6.21278	0.005	0.0310639																Cl	25.2478	0	200	25.2478	200	12.6239	0.005	0.0631194												Cl	25.7333	0	200	25.7333
	P	0.518889	0	5	0.518889	5	10.3778	0.2	2.07556																P	0.71	0	5	0.71	5	14.2	0.2	2.84												P	0.851111	0	5	0.851111
	NH4H	0.0524444	0	1	0.0524444	1	5.24444	1	5.24444																NH4H	0.157333	0	1	0.157333	1	15.7333	1	15.7333												NH4H	0.125111	0	1	0.125111
	No2	0.0297778	0	1	0.0297778	1	2.97778	1	2.97778																No2	0.101222	0	1	0.101222	1	10.1222	1	10.1222												No2	0.0971111	0	1	0.0971111
	NO3	1.18778	0	10	1.18778	10	11.8778	0.1	1.18778																NO3	1.50556	0	10	1.50556	10	15.0556	0.1	1.50556												NO3	1.43222	0	10	1.43222
	SO4	0.461111	0	500	0.461111	500	0.0922222	0.002	0.000184444																SO4	0.823333	0	500	0.823333	500	0.164667	0.002	0.000329333												SO4	0.83	0	500	0.83
	Fe	0.445556	0	1	0.445556	1	44.5556	1	44.5556																Fe	1.01556	0	1	1.01556	1	101.556	1	101.556												Fe	0.804444	0	1	0.804444
	Mn	0.0467778	0	0.05	0.0467778	0.05	93.5556	20	1871.11																Mn	0.100222	0	0.05	0.100222	0.05	200.444	20	4008.89												Mn	0.0676667	0	0.05	0.0676667
	Zn	0.142222	0	1	0.142222	1	14.2222	1	14.2222																Zn	0.436667	0	1	0.436667	1	43.6667	1	43.6667												Zn	0.355556	0	1	0.355556
	Cu	0.0206667	0	0.1	0.0206667	0.1	20.6667	10	206.667																Cu	0.0374444	0	0.1	0.0374444	0.1	37.4444	10	374.444												Cu	0.031	0	0.1	0.031
	Cr	0.00333333	0	0.05	0.00333333	0.05	6.66667	20	133.333																Cr	0.015	0	0.05	0.015	0.05	30	20	600												Cr	0.029	0	0.05	0.029
	Cd	0.00288889	0	0.01	0.00288889	0.01	28.8889	100	2888.89																Cd	0.0268889	0	0.01	0.0268889	0.01	268.889	100	26888.9												Cd	0.0168889	0	0.01	0.0168889
	Ni	0.000555556	0	0.05	0.000555556	0.05	1.11111	20	22.2222																Ni	0.00722222	0	0.05	0.00722222	0.05	14.4444	20	288.889												Ni	0.00344444	0	0.05	0.00344444
	Pb	0.00622222	0	0.05	0.00622222	0.05	12.4444	20	248.889																Pb	0.0177778	0	0.05	0.0177778	0.05	35.5556	20	711.111												Pb	0.0235556	0	0.05	0.0235556
	V	0.000444444	0	0.01	0.000444444	0.01	4.44444	100	444.444																V	0.00566667	0	0.01	0.00566667	0.01	56.6667	100	5666.67												V	0.00322222	0	0.01	0.00322222
	THC	0.0122222	0	0.05	0.0122222	0.05	24.4444	20	488.889																THC	0.0855556	0	0.05	0.0855556	0.05	171.111	20	3422.22												THC	0.0666667	0	0.05	0.0666667
	Σ							315.981	6669.8																Σ							315.981	42571.6												Σ
	WQI								21.1082																WQI								134.729												WQI
		V actual	V ideal	V Standard	V actual - V ideal	V Standard -V ideal	Qi	Wi	WiQi																	V actual	V ideal	V Standard	V actual - V ideal	V Standard -V ideal	Qi	Wi	WiQi													V actual	V ideal	V Standard	V actual - V ideal
	Water Temp	25.9	0	35	25.9	35	74	0.0285714	2.11429																Water Temp	26.7	0	35	26.7	35	76.2857	0.0285714	2.17959												Water Temp	26.29	0	35	26.29
	pH	5.98759	7	7.5	1.01241	0.5	202.481	0.133333	26.9975																pH	5.67667	7	7.5	1.32333	0.5	264.667	0.133333	35.2889												pH	6.02778	7	7.5	0.972222
	Col.	5.40463	0	15	5.40463	15	36.0309	0.0666667	2.40206																Col.	7.89247	0	15	7.89247	15	52.6165	0.0666667	3.50776												Col.	7.07037	0	15	7.07037
	Turb.	4.26889	0	5	4.26889	5	85.3778	0.2	17.0756																Turb.	6.66037	0	5	6.66037	5	133.207	0.2	26.6415												Turb.	5.66	0	5	5.66
	TSS	5.65611	0	10	5.65611	10	56.5611	0.1	5.65611																TSS	9.82346	0	10	9.82346	10	98.2346	0.1	9.82346												TSS	8.35741	0	10	8.35741
	TDS	55.8322	0	500	55.8322	500	11.1664	0.002	0.0223329																TDS	75.5028	0	500	75.5028	500	15.1006	0.002	0.0302011												TDS	70.5081	0	500	70.5081
	DO	6.27259	14.6	7.5	-8.32741	-7.1	117.287	0.133333	15.6383																DO	5.6837	14.6	7.5	-8.9163	-7.1	125.582	0.133333	16.7442												DO	5.88222	14.6	7.5	-8.71778
	BOD5	2.19222	0	1	2.19222	1	219.222	1	219.222																BOD5	3.67025	0	1	3.67025	1	367.025	1	367.025												BOD5	3.09704	0	1	3.09704
	HCo3	17.3722	0	200	17.3722	200	8.68611	0.005	0.0434306																HCo3	37.8349	0	200	37.8349	200	18.9175	0.005	0.0945873												HCo3	35.3896	0	200	35.3896
	Na	0.680833	0	200	0.680833	200	0.340417	0.005	0.00170208																Na	0.978765	0	200	0.978765	200	0.489383	0.005	0.00244691												Na	0.812593	0	200	0.812593
	Cl	16.3281	0	200	16.3281	200	8.16407	0.005	0.0408204																Cl	32.5733	0	200	32.5733	200	16.2867	0.005	0.0814333												Cl	28.3389	0	200	28.3389
	P	0.652037	0	5	0.652037	5	13.0407	0.2	2.60815																P	1.15858	0	5	1.15858	5	23.1716	0.2	4.63432												P	1.06759	0	5	1.06759
	NH4H	0.0747963	0	1	0.0747963	1	7.47963	1	7.47963																NH4H	0.187914	0	1	0.187914	1	18.7914	1	18.7914												NH4H	0.108093	0	1	0.108093
	No2	0.0450741	0	1	0.0450741	1	4.50741	1	4.50741																No2	0.114654	0	1	0.114654	1	11.4654	1	11.4654												No2	0.0928148	0	1	0.0928148
	NO3	1.39769	0	10	1.39769	10	13.9769	0.1	1.39769																NO3	2.19068	0	10	2.19068	10	21.9068	0.1	2.19068												NO3	1.91241	0	10	1.91241
	SO4	0.565185	0	500	0.565185	500	0.113037	0.002	0.000226074																SO4	0.950556	0	500	0.950556	500	0.190111	0.002	0.000380222												SO4	0.847222	0	500	0.847222
	Fe	0.504815	0	1	0.504815	1	50.4815	1	50.4815																Fe	1.36451	0	1	1.36451	1	136.451	1	136.451												Fe	1.07093	0	1	1.07093
	Mn	0.0559074	0	0.05	0.0559074	0.05	111.815	20	2236.3																Mn	0.150333	0	0.05	0.150333	0.05	300.667	20	6013.33												Mn	0.108889	0	0.05	0.108889
	Zn	0.178704	0	1	0.178704	1	17.8704	1	17.8704																Zn	0.547346	0	1	0.547346	1	54.7346	1	54.7346												Zn	0.418519	0	1	0.418519
	Cu	0.0211111	0	0.1	0.0211111	0.1	21.1111	10	211.111																Cu	0.0428704	0	0.1	0.0428704	0.1	42.8704	10	428.704												Cu	0.0307222	0	0.1	0.0307222
	Cr	0.00655556	0	0.05	0.00655556	0.05	13.1111	20	262.222																Cr	0.0268889	0	0.05	0.0268889	0.05	53.7778	20	1075.56												Cr	0.0251111	0	0.05	0.0251111
	Cd	0.00648148	0	0.01	0.00648148	0.01	64.8148	100	6481.48																Cd	0.0296049	0	0.01	0.0296049	0.01	296.049	100	29604.9												Cd	0.017463	0	0.01	0.017463
	Ni	0.00125926	0	0.05	0.00125926	0.05	2.51852	20	50.3704																Ni	0.00795062	0	0.05	0.00795062	0.05	15.9012	20	318.025												Ni	0.00392593	0	0.05	0.00392593
	Pb	0.00625926	0	0.05	0.00625926	0.05	12.5185	20	250.37																Pb	0.0250494	0	0.05	0.0250494	0.05	50.0988	20	1001.98												Pb	0.0210741	0	0.05	0.0210741
	V	0.000962963	0	0.01	0.000962963	0.01	9.62963	100	962.963																V	0.00671605	0	0.01	0.00671605	0.01	67.1605	100	6716.05												V	0.0032963	0	0.01	0.0032963
	THC	0.0325926	0	0.05	0.0325926	0.05	65.1852	20	1303.7																THC	0.102222	0	0.05	0.102222	0.05	204.444	20	4088.89												THC	0.0722222	0	0.05	0.0722222
	Σ							315.981	12132.1																Σ							315.981	49937.2												Σ
	WQI								38.395																WQI								158.039												WQI
		V actual	V ideal	V Standard	V actual - V ideal	V Standard -V ideal	Qi	Wi	WiQi																	V actual	V ideal	V Standard	V actual - V ideal	V Standard -V ideal	Qi	Wi	WiQi													V actual	V ideal	V Standard	V actual - V ideal
	Water Temp	24.6	0	35	24.6	35	70.2857	0.0285714	2.00816																Water Temp	24.9	0	35	24.9	35	71.1429	0.0285714	2.03265												Water Temp	27	0	35	27
	pH	6.03056	7	7.5	0.969444	0.5	193.889	0.133333	25.8519																pH	6.00111	7	7.5	0.998889	0.5	199.778	0.133333	26.637												pH	6.4	7	7.5	0.6
	Col.	4.50278	0	15	4.50278	15	30.0185	0.0666667	2.00123																Col.	6.80741	0	15	6.80741	15	45.3827	0.0666667	3.02551												Col.	5.6	0	15	5.6
	Turb.	3.27	0	5	3.27	5	65.4	0.2	13.08																Turb.	5.58111	0	5	5.58111	5	111.622	0.2	22.3244												Turb.	4.35	0	5	4.35
	TSS	3.83833	0	10	3.83833	10	38.3833	0.1	3.83833																TSS	7.91481	0	10	7.91481	10	79.1481	0.1	7.91481												TSS	5.25	0	10	5.25
	TDS	53.2233	0	500	53.2233	500	10.6447	0.002	0.0212893																TDS	64.5274	0	500	64.5274	500	12.9055	0.002	0.025811												TDS	61.55	0	500	61.55
	DO	6.35889	14.6	7.5	-8.24111	-7.1	116.072	0.133333	15.4763																DO	5.91444	14.6	7.5	-8.68556	-7.1	122.332	0.133333	16.3109												DO	6.35	14.6	7.5	-8.25
	BOD5	2.44667	0	1	2.44667	1	244.667	1	244.667																BOD5	3.65519	0	1	3.65519	1	365.519	1	365.519												BOD5	3.45	0	1	3.45
	HCo3	17.8667	0	200	17.8667	200	8.93333	0.005	0.0446667																HCo3	31.2126	0	200	31.2126	200	15.6063	0.005	0.0780315												HCo3	31.95	0	200	31.95
	Na	0.605833	0	200	0.605833	200	0.302917	0.005	0.00151458																Na	0.931852	0	200	0.931852	200	0.465926	0.005	0.00232963												Na	0.71	0	200	0.71
	Cl	13.1256	0	200	13.1256	200	6.56278	0.005	0.0328139																Cl	23.4056	0	200	23.4056	200	11.7028	0.005	0.0585139												Cl	20.75	0	200	20.75
	P	0.603889	0	5	0.603889	5	12.0778	0.2	2.41556																P	0.952407	0	5	0.952407	5	19.0481	0.2	3.80963												P	0.915	0	5	0.915
	NH4H	0.0589444	0	1	0.0589444	1	5.89444	1	5.89444																NH4H	0.133407	0	1	0.133407	1	13.3407	1	13.3407												NH4H	0.0685	0	1	0.0685
	No2	0.0367778	0	1	0.0367778	1	3.67778	1	3.67778																No2	0.109741	0	1	0.109741	1	10.9741	1	10.9741												No2	0.08	0	1	0.08
	NO3	1.31528	0	10	1.31528	10	13.1528	0.1	1.31528																NO3	1.74648	0	10	1.74648	10	17.4648	0.1	1.74648												NO3	1.465	0	10	1.465
	SO4	0.511111	0	500	0.511111	500	0.102222	0.002	0.000204444																SO4	0.831667	0	500	0.831667	500	0.166333	0.002	0.000332667												SO4	0.795	0	500	0.795
	Fe	0.505556	0	1	0.505556	1	50.5556	1	50.5556																Fe	0.797963	0	1	0.797963	1	79.7963	1	79.7963												Fe	0.665	0	1	0.665
	Mn	0.0632778	0	0.05	0.0632778	0.05	126.556	20	2531.11																Mn	0.0981111	0	0.05	0.0981111	0.05	196.222	20	3924.44												Mn	0.09	0	0.05	0.09
	Zn	0.157222	0	1	0.157222	1	15.7222	1	15.7222																Zn	0.352037	0	1	0.352037	1	35.2037	1	35.2037												Zn	0.27	0	1	0.27
	Cu	0.0176667	0	0.1	0.0176667	0.1	17.6667	10	176.667																Cu	0.0231667	0	0.1	0.0231667	0.1	23.1667	10	231.667												Cu	0.0095	0	0.1	0.0095
	Cr	0.00333333	0	0.05	0.00333333	0.05	6.66667	20	133.333																Cr	0.02	0	0.05	0.02	0.05	40	20	800												Cr	0.01	0	0.05	0.01
	Cd	0.00288889	0	0.01	0.00288889	0.01	28.8889	100	2888.89																Cd	0.0272593	0	0.01	0.0272593	0.01	272.593	100	27259.3												Cd	0.0095	0	0.01	0.0095
	Ni	0.000555556	0	0.05	0.000555556	0.05	1.11111	20	22.2222																Ni	0.0022963	0	0.05	0.0022963	0.05	4.59259	20	91.8519												Ni	0	0	0.05	0
	Pb	0.00622222	0	0.05	0.00622222	0.05	12.4444	20	248.889																Pb	0.0217037	0	0.05	0.0217037	0.05	43.4074	20	868.148												Pb	0.011	0	0.05	0.011
	V	0.000444444	0	0.01	0.000444444	0.01	4.44444	100	444.444																V	0.00214815	0	0.01	0.00214815	0.01	21.4815	100	2148.15												V	0	0	0.01	0
	THC	0.0122222	0	0.05	0.0122222	0.05	24.4444	20	488.889																THC	0.0811111	0	0.05	0.0811111	0.05	162.222	20	3244.44												THC	0.04	0	0.05	0.04
	Σ							315.981	7321.05																Σ							315.981	39156.8												Σ
	WQI								23.1693																WQI								123.921												WQI
		V actual	V ideal	V Standard	V actual - V ideal	V Standard -V ideal	Qi	Wi	WiQi																	V actual	V ideal	V Standard	V actual - V ideal	V Standard -V ideal	Qi	Wi	WiQi													V actual	V ideal	V Standard	V actual - V ideal
	Water Temp	27.2	0	35	27.2	35	77.7143	0.0285714	2.22041																Water Temp	26.7	0	35	26.7	35	76.2857	0.0285714	2.17959												Water Temp	26.7	0	35	26.7
	pH	6.02667	7	7.5	0.973333	0.5	194.667	0.133333	25.9556																pH	5.48667	7	7.5	1.51333	0.5	302.667	0.133333	40.3556												pH	5.95667	7	7.5	1.04333
	Col.	7.63333	0	15	7.63333	15	50.8889	0.0666667	3.39259																Col.	11.2667	0	15	11.2667	15	75.1111	0.0666667	5.00741												Col.	10	0	15	10
	Turb.	6.46667	0	5	6.46667	5	129.333	0.2	25.8667																Turb.	9.73333	0	5	9.73333	5	194.667	0.2	38.9333												Turb.	7.83333	0	5	7.83333
	TSS	8.76667	0	10	8.76667	10	87.6667	0.1	8.76667																TSS	14.5333	0	10	14.5333	10	145.333	0.1	14.5333												TSS	13	0	10	13
	TDS	62.2	0	500	62.2	500	12.44	0.002	0.02488																TDS	90.6	0	500	90.6	500	18.12	0.002	0.03624												TDS	77.1333	0	500	77.1333
	DO	6.2	14.6	7.5	-8.4	-7.1	118.31	0.133333	15.7746																DO	5.46667	14.6	7.5	-9.13333	-7.1	128.638	0.133333	17.1518												DO	6.2	14.6	7.5	-8.4
	BOD5	1.83333	0	1	1.83333	1	183.333	1	183.333																BOD5	3.86667	0	1	3.86667	1	386.667	1	386.667												BOD5	2.73333	0	1	2.73333
	HCo3	18.0333	0	200	18.0333	200	9.01667	0.005	0.0450833																HCo3	47.8	0	200	47.8	200	23.9	0.005	0.1195												HCo3	39.6	0	200	39.6
	Na	0.863333	0	200	0.863333	200	0.431667	0.005	0.00215833																Na	1.14667	0	200	1.14667	200	0.573333	0.005	0.00286667												Na	0.98	0	200	0.98
	Cl	23.4333	0	200	23.4333	200	11.7167	0.005	0.0585833																Cl	49.0667	0	200	49.0667	200	24.5333	0.005	0.122667												Cl	38.5333	0	200	38.5333
	P	0.833333	0	5	0.833333	5	16.6667	0.2	3.33333																P	1.81333	0	5	1.81333	5	36.2667	0.2	7.25333												P	1.43667	0	5	1.43667
	NH4H	0.113	0	1	0.113	1	11.3	1	11.3																NH4H	0.273	0	1	0.273	1	27.3	1	27.3												NH4H	0.130667	0	1	0.130667
	No2	0.0686667	0	1	0.0686667	1	6.86667	1	6.86667																No2	0.133	0	1	0.133	1	13.3	1	13.3												No2	0.101333	0	1	0.101333
	NO3	1.69	0	10	1.69	10	16.9	0.1	1.69																NO3	3.32	0	10	3.32	10	33.2	0.1	3.32												NO3	2.84	0	10	2.84
	SO4	0.723333	0	500	0.723333	500	0.144667	0.002	0.000289333																SO4	1.19667	0	500	1.19667	500	0.239333	0.002	0.000478667												SO4	0.916667	0	500	0.916667
	Fe	0.563333	0	1	0.563333	1	56.3333	1	56.3333																Fe	2.28	0	1	2.28	1	228	1	228												Fe	1.74333	0	1	1.74333
	Mn	0.0576667	0	0.05	0.0576667	0.05	115.333	20	2306.67																Mn	0.252667	0	0.05	0.252667	0.05	505.333	20	10106.7												Mn	0.169	0	0.05	0.169
	Zn	0.236667	0	1	0.236667	1	23.6667	1	23.6667																Zn	0.853333	0	1	0.853333	1	85.3333	1	85.3333												Zn	0.63	0	1	0.63
	Cu	0.025	0	0.1	0.025	0.1	25	10	250																Cu	0.068	0	0.1	0.068	0.1	68	10	680												Cu	0.0516667	0	0.1	0.0516667
	Cr	0.013	0	0.05	0.013	0.05	26	20	520																Cr	0.0456667	0	0.05	0.0456667	0.05	91.3333	20	1826.67												Cr	0.0363333	0	0.05	0.0363333
	Cd	0.0136667	0	0.01	0.0136667	0.01	136.667	100	13666.7																Cd	0.0346667	0	0.01	0.0346667	0.01	346.667	100	34666.7												Cd	0.026	0	0.01	0.026
	Ni	0.00266667	0	0.05	0.00266667	0.05	5.33333	20	106.667																Ni	0.0143333	0	0.05	0.0143333	0.05	28.6667	20	573.333												Ni	0.00833333	0	0.05	0.00833333
	Pb	0.00633333	0	0.05	0.00633333	0.05	12.6667	20	253.333																Pb	0.0356667	0	0.05	0.0356667	0.05	71.3333	20	1426.67												Pb	0.0286667	0	0.05	0.0286667
	V	0.002	0	0.01	0.002	0.01	20	100	2000																V	0.0123333	0	0.01	0.0123333	0.01	123.333	100	12333.3												V	0.00666667	0	0.01	0.00666667
	THC	0.0733333	0	0.05	0.0733333	0.05	146.667	20	2933.33																THC	0.14	0	0.05	0.14	0.05	280	20	5600												THC	0.11	0	0.05	0.11
	Σ							315.981	22405.3																Σ							315.981	68082.9												Σ
	WQI								70.9071																WQI								215.465												WQI
	MONTHS	WQI STATION 1	WQI STATION 2	WQI STATION 3	WQI STATION 4					WQI
	March	72.9398	214.384	329.138	197.167
	April	39.4733	39.4733	91.0792	76.0958
	May	3.38466	108.948	19.0592	167.074
	June	11.6293	133.637	90.6072	157.366				Mean	SD	Min	Max	Mean	SD	Min	Max	Mean	SD	Min	Max	Mean	SD	Min	Max
	July	89.4526	292.369	214.429	219.329				Mean	SD	Min	Max	Mean	SD	Min	Max	Mean	SD	Min	Max	Mean	SD	Min	Max
	August	48.1742	292.369	139.979	74.5187			WQI	66.3818	56.1808	3.38466	197.24	163.786	106.515	27.5879	420.614	161.434	177.134	18.6779	728.496	129.954	72.8613	15.0855	311.622
	September	75.0939	197.669	100.499	100.499
	October	8.2888	27.5879	18.6779	58.1001
	November	151.398	27.5879	155.731	101.088
	December	151.398	68.3166	22.0135	15.0855
	January	197.24	420.614	728.496	311.622
	February	42.4336	91.9452	68.976	33.2789
	March	102.076	239.493	374.642	165.849
	April	48.3115	161.601	161.593	136.34
	May	21.1082	134.729	90.4201	153.593
	June	38.395	158.039	97.7245	131.439
	July	23.1693	123.921	51.1185	123.41
	August	70.9071	215.465	151.635	117.316
	Mean	66.3818	163.786	161.434	129.954
	SD	56.1808	106.515	177.134	72.8613
	Min	3.38466	27.5879	18.6779	15.0855
	Max	197.24	420.614	728.496	311.622
[truncated: 58 more columns]

## Sheet: Mean values
									2015										2016
									Mar	Apr	May	Jun	Jul	Aug	Sept	Oct	Nov	Dec	Jan	Feb
	72.9398	214.384	329.138	197.167																	Mean	SD	Min	Max
	39.4733	39.4733	91.0792	76.0958				Station 1	72.9398	39.4733	3.38466	11.6293	89.4526	48.1742	75.0939	8.2888	151.398	151.398	197.24	42.4336	74.2421	62.8558	3.38466	197.24
	3.38466	108.948	19.0592	167.074				Station 2	214.384	39.4733	108.948	133.637	292.369	292.369	197.669	27.5879	27.5879	68.3166	420.614	91.9452	159.575	125.506	27.5879	420.614
	11.6293	133.637	90.6072	157.366				Station 3	329.138	91.0792	19.0592	90.6072	214.429	139.979	100.499	18.6779	155.731	22.0135	728.496	68.976	164.89	198.896	18.6779	728.496
	89.4526	292.369	214.429	219.329				Station 4	197.167	76.0958	167.074	157.366	219.329	74.5187	100.499	58.1001	101.088	15.0855	311.622	33.2789	125.935	86.7718	15.0855	311.622
	48.1742	292.369	139.979	74.5187
	75.0939	197.669	100.499	100.499
	8.2888	27.5879	18.6779	58.1001
	151.398	27.5879	155.731	101.088
	151.398	68.3166	22.0135	15.0855
	197.24	420.614	728.496	311.622
	42.4336	91.9452	68.976	33.2789
																						Station 1	Station 2	Station 3	Station 4			Mar	Apr	May	Jun	Jul	Aug	Sept	Oct	Nov	Dec	Jan	Feb
																						± SD	± SD	± SD	± SD		Station 1	72.9398	39.4733	3.38466	11.6293	89.4526	48.1742	75.0939	8.2888	151.398	151.398	197.24	42.4336
																						(Min-Max)	(Min-Max)	(Min-Max)	(Min-Max)		Station 2	214.384	39.4733	108.948	133.637	292.369	292.369	197.669	27.5879	27.5879	68.3166	420.614	91.9452
1	72.9398																				WQI	74.2421	159.575	164.89	125.935		Station 3	329.138	91.0792	19.0592	90.6072	214.429	139.979	100.499	18.6779	155.731	22.0135	728.496	68.976
1	39.4733																										Station 4	197.167	76.0958	167.074	157.366	219.329	74.5187	100.499	58.1001	101.088	15.0855	311.622	33.2789
1	3.38466
1	11.6293
1	89.4526																					Stations 1	Stations 2	Stations 3
1	48.1742																						± SD	± SD	Bench Mark
1	75.0939																						(Min-Max)	(Min-Max)
1	8.2888																				WQI	116.92±68.21	67.22±77.55	61.87±81.60	100
1	151.398																					(59.57-240.95)	(19.99-223.33)	(17.69-226.21)
1	151.398
1	197.24
1	42.4336
2	214.384
2	39.4733
2	108.948
2	133.637
2	292.369
2	292.369
2	197.669
2	27.5879
2	27.5879
2	68.3166
2	420.614
2	91.9452
3	329.138
3	91.0792
3	19.0592
3	90.6072
3	214.429
3	139.979
3	100.499
3	18.6779
3	155.731
3	22.0135
3	728.496
3	68.976
4	197.167
4	76.0958
4	167.074
4	157.366
4	219.329
4	74.5187
4	100.499
4	58.1001
4	101.088
4	15.0855
4	311.622
4	33.2789

## Sheet: WQI VS parameters
			Water Temp	pH	Col.	Turb.	TSS	TDS	DO	BOD5	HCo3	Na	Cl	P	NH4H	No2	NO3	SO4	Fe	Mn	Zn	Cu	Cr	Cd	Ni	Pb	V	THC	Σ	WQI
		WiQi	2.20408	42.6667	3.15556	26.4	7.5	0.03524	17.4648	320	0.107	0.002125	0.038	2.36	34	69	3.28	0.000212	84	2720	49	680	1240	22000	1560	680	33000	5200	67741.2	214.384
		WiQi	2.12245	45.3333	2.44444	18.8	6.3	0.0246	17.0892	320	0.04575	0.0016	0.031	1.88	8.1	3.7	1.94	0.000304	38	2080	17	350	400	6000	0	760	0	2400	12472.8	39.4733
		WiQi	2.22041	53.3333	1.82222	14.8	6.2	0.03104	17.4648	330	0.0915	0.00175	0.06875	2	16.3	7.1	0.93	0.000344	111	3720	52	490	200	18000	400	200	8000	2800	34425.4	108.948
		WiQi	2.13061	24	3.46667	24.8	8.8	0.0228	15.3991	390	0.061	0.002625	0.0505	3.72	13.9	10.4	1.84	0.000308	74	4800	34	140	440	32000	0	640	0	3600	42226.6	133.637
		WiQi	2.03265	53.3333	2.57778	15.6	9.1	0.0258	16.5258	470	0.0915	0.002125	0.04425	3.4	29.3	19	1.01	0.00034	122	10000	59	260	1520	51000	960	1240	21000	5600	92383	292.369
		WiQi	2.03265	53.3333	2.57778	15.6	9.1	0.0258	16.5258	470	0.0915	0.002125	0.04425	3.4	29.3	19	1.01	0.00034	122	10000	59	260	1520	51000	960	1240	21000	5600	92383	292.369
		WiQi	2.17959	44.2667	5.64444	45.6	15.1	0.04412	18.216	390	0.1525	0.003	0.2135	5.92	32.5	9.4	3.42	0.000616	243	7600	94	870	2320	28000	760	2000	16000	4000	62459.7	197.669
		WiQi	2.21224	28.2667	3.6	21.6	13.5	0.0308	17.277	280	0.061	0.002675	0.05375	1.32	7	6	3.31	0.000452	57	5240	66	170	0	0	0	0	0	2800	8717.23	27.5879
		WiQi	2.21224	28.2667	3.6	21.6	13.5	0.0308	17.277	280	0.061	0.002675	0.05375	1.32	7	6	3.31	0.000452	57	5240	66	170	0	0	0	0	0	2800	8717.23	27.5879
		WiQi	2.2449	47.4667	1.02222	7.2	9.1	0.0378	17.277	370	0.0865	0.002025	0.08525	3.16	12.1	6.1	2.86	0.000364	227	6000	61	940	600	9000	0	680	0	3600	21586.7	68.3166
		WiQi	2.16327	29.0667	2.26667	19.2	7	0.04224	14.4601	260	0.11675	0.00395	0.148	9.6	27.4	9.2	4.2	0.000532	329	7600	92	1300	5040	81000	1520	4840	24000	6800	132906	420.614
		WiQi	2.21224	34.1333	1.28889	7.2	4.7	0.0296	17.4648	230	0.0915	0.002775	0.0475	2.44	5.1	3.7	1.51	0.000252	95	2960	38	530	1000	19000	0	1520	0	3600	29052.9	91.9452

## Sheet: Health risks
													Station 1	Station 2	Station 3	Station 4	Sum of Metals
												Fe	0.649218	1.65915	1.42706	0.867778	1.1508
	Surface water	Fe	Zn	Mn	Cu	Pb	Cr	Cd	Ni	V		Zn	0.0648313	0.1485	0.113975	0.0958436	0.105788
	Station 1	0.649218	0.0648313	0.237305	0.0316358	0.0105679	0.0110329	0.00215021	0.0128169	0.00167695		Mn	0.237305	0.627743	0.546708	0.380597	0.448088
	Station 2	1.65915	0.1485	0.627743	0.0599342	0.0345475	0.0316159	0.0125816	0.0353073	0.0101036		Cu	0.0316358	0.0599342	0.0549383	0.0379012	0.0461024
	Station 3	1.42706	0.113975	0.546708	0.0549383	0.0366914	0.0296955	0.0106687	0.0344979	0.00943621		Pb	0.0105679	0.0345475	0.0366914	0.0216811	0.025872
	Station 4	0.867778	0.0958436	0.380597	0.0379012	0.0216811	0.0265288	0.00520576	0.015142	0.00379424		Cr	0.0110329	0.0316159	0.0296955	0.0265288	0.0247183
	C water	1.1508	0.105788	0.448088	0.0461024	0.025872	0.0247183	0.00765158	0.024441	0.00625274		Cd	0.00215021	0.0125816	0.0106687	0.00520576	0.00765158
												Ni	0.0128169	0.0353073	0.0344979	0.015142	0.024441
												V	0.00167695	0.0101036	0.00943621	0.00379424	0.00625274
	C water	IR	EF	ED	BW	AT	EXPing
Fe	1.1508	2.2	360	30	70	10950	0.0356726
Zn	0.105788	2.2	360	30	70	10950	0.00327921
Mn	0.448088	2.2	360	30	70	10950	0.0138899
Cu	0.0461024	2.2	360	30	70	10950	0.00142908
Pb	0.025872	2.2	360	30	70	10950	0.00080198
Cr	0.0247183	2.2	360	30	70	10950	0.000766218
Cd	0.00765158	2.2	360	30	70	10950	0.000237184
Ni	0.024441	2.2	360	30	70	10950	0.000757624
V	0.00625274	2.2	360	30	70	10950	0.000193823
	Cwater	SA	KP	ET	EF	ED	CF	BW	AT	Exderm
Fe	1.1508	28000	0.01	0.6	360	30	0.001	70	10950	0.00272409
Zn	0.105788	28000	0.0006	0.6	360	30	0.001	70	10950	1.50247e-05
Mn	0.448088	28000	0.001	0.6	360	30	0.001	70	10950	0.000106068
Cu	0.0461024	28000	0.001	0.6	360	30	0.001	70	10950	1.0913e-05
Pb	0.025872	28000	0.004	0.6	360	30	0.001	70	10950	2.44969e-05
Cr	0.0247183	28000	0.002	0.6	360	30	0.001	70	10950	1.17022e-05
Cd	0.00765158	28000	0.001	0.6	360	30	0.001	70	10950	1.81122e-06														EXPing	Sfing	CR
Ni	0.024441	28000	0.01	0.6	360	30	0.001	70	10950	5.78549e-05
V	0.00625274	28000	0.01	0.6	360	30	0.001	70	10950	1.4801e-05
					Elements	Rf ingestion (mg/kg/d)	Rf dermal (mg/kg/d)	EXPing	Expderm	HQ ing/derm	HQ ingestion	HQ dermal	∑HQS	∑HI ing/derm	CDI
					Fe	700	140	0.0356726	0.00272409	0.000133625	5.09608e-05	1.94578e-05	7.04186e-05	2.61905	0.036168
					Zn	24	0.96	0.00327921	1.50247e-05	9.47283	0.000136634	1.56508e-05	0.000152284	8.73016	0.00332475									Elements	Rfdigestion	Rfdermal	Exping	Exderm	HQingestion	HQdermal	∑HQs	CDI
					Mn	300	60	0.0138899	0.000106068	0.00727513	4.62995e-05	1.7678e-06	4.80673e-05	26.1905	0.0140828										(mg/kg/d)	(mg/kg/d)
					Cu	40	8	0.00142908	1.0913e-05	0.409226	3.57271e-05	1.36412e-06	3.70912e-05	26.1905	0.00144893				Fe	0.7	0
					Pb	3	0.075	0.00080198	2.44969e-05	145.503	0.000267327	0.000326625	0.000593951	0.818452	0.000813119				Zn	0.3	0.06			Fe	700	140	4.27723e+06	326625	6110.33	2333.03	8443.36	0.036168
					Cr	0.5	0.025	0.000766218	1.17022e-05	5238.1	0.00153244	0.00046809	0.00200053	3.27381	0.00077686				Mn	0.014	0.06			Mn	24	0.96	393185	1801.5	16382.7	1876.57	18259.3	0.00332475
					Cd			0.000237184	1.81122e-06	ND	ND			0	0.000240478				Cu	0.4	0.0019			Zn	300	60	1.66543e+06	12717.8	5551.43	211.964	5763.39	0.0140828
					Ni	1.4	0.42	0.000757624	5.78549e-05	22.2708	0.00054116	0.00013775	0.000678909	3.92857	0.000768146				Pb	0.0035	0.0019			Cu	40	8	171351	1308.5	4283.77	163.562	4447.33	0.00144893
					V	NS	NS	0.000193823	1.4801e-05	ND	ND	ND		ND	0.000196515				Cr	0.0003	6e-05			Cr	3	0.075	96159.4	2937.23	32053.1	39163.1	71216.3	0.000813119
					∑HI ing/derm						0.00054116	0.00013775	0.000678909						Cd	0.0005	1e-05			Cd	0.5	0.025	91871.5	1403.13	183743	56125.1	239868	0.00077686
																			Ni	0.02	0.001			Ni			28438.9	217.17				0.000240478
																			V	NS	NS			Pb	1.4	0.42	90841	6936.95	64886.4	16516.5	81402.9	0.000768146
																								V			23239.8	1774.68				0.000196515
																								∑HIing/derm					313011	116390
							Elements	Rf ingestion (mg/kg/d)	Rf dermal (mg/kg/d)	EXPing	Expderm	HQ ing/derm	HQ ingestion	HQ dermal	∑HQS	∑HI ing/derm	CDI
	Cwater	DI	BW	CDI			Fe	0.7	1.4	0.0356726	0.00272409	5145.35	0.0509608	0.00194578	0.0529066	26.1905	0.036168
Fe	1.1508	2.2	70	0.036168			Zn	0.3	0.06	0.00327921	1.50247e-05	1.01483e+08	0.0109307	0.000250412	0.0111811	43.6508	0.00332475
Zn	0.105788	2.2	70	0.00332475			Mn	0.014	0.06	0.0138899	0.000106068	158378	0.992133	0.0017678	0.9939	561.224	0.0140828
Mn	0.448088	2.2	70	0.0140828			Cu	0.4	0.0019	0.00142908	1.0913e-05	1.34991e+10	0.00357271	0.00574368	0.00931639	0.622024	0.00144893
Cu	0.0461024	2.2	70	0.00144893			Pb	0.0035	0.0019	0.00080198	2.44969e-05	9.37649e+07	0.229137	0.0128931	0.24203	17.7721	0.000813119
Pb	0.025872	2.2	70	0.000813119			Cr	0.0003	6e-05	0.000766218	1.17022e-05	5.57633e+08	2.55406	0.195037	2.7491	13.0952	0.00077686
Cr	0.0247183	2.2	70	0.00077686			Cd	0.0005	1e-05	0.000237184	1.81122e-06	1.16389e+11	0.474368	0.181122	0.65549	2.61905	0.000240478
Cd	0.00765158	2.2	70	0.000240478			Ni	0.02	0.001	0.000757624	5.78549e-05	4.56285e+08	0.0378812	0.0578549	0.0957361	0.654762	0.000768146
Ni	0.024441	2.2	70	0.000768146			V	NS	NS	0.000193823	1.4801e-05	ND	0	0	0	ND	0.000196515
V	0.00625274	2.2	70	0.000196515			∑HI ing/derm						4.35304	0.456615	4.80966
							Elements	Rf ingestion (mg/kg/d)	Rf dermal (mg/kg/d)	EXPing	Expderm	HQ ing/derm	HQ ingestion	HQ dermal	∑HQS	∑HI ing/derm	CDI
Elements	EXPING	Sfing	CR	CR			Fe	0.7	1.4	0.0356726	0.00272409	5145.35	0.0509608	0.00194578	0.0529066	26.1905	0.036168
Pb	0.0008	8.5	9.41176e-05	0.0068			Zn	0.3	0.06	0.00327921	1.50247e-05	1.01483e+08	0.0109307	0.000250412	0.0111811	43.6508	0.00332475
Cr	0.0008	500	1.6e-06	0.4			Mn	0.014	0.06	0.0138899	0.000106068	158378	0.992133	0.0017678	0.9939	561.224	0.0140828
Cd	0.0002	6100	3.27869e-08	1.22			Cu	0.4	0.0019	0.00142908	1.0913e-05	1.34991e+10	0.00357271	0.00574368	0.00931639	0.622024	0.00144893
							Pb	0.0035	0.0019	0.00080198	2.44969e-05	9.37649e+07	0.229137	0.0128931	0.24203	17.7721	0.000813119
							Cr	0.0003	6e-05	0.000766218	1.17022e-05	5.57633e+08	2.55406	0.195037	2.7491	13.0952	0.00077686
							Cd	0.0005	1e-05	0.000237184	1.81122e-06	1.16389e+11	0.474368	0.181122	0.65549	2.61905	0.000240478
							Ni	0.02	0.001	0.000757624	5.78549e-05	4.56285e+08	0.0378812	0.0578549	0.0957361	0.654762	0.000768146
							V	NS	NS	0.000193823	1.4801e-05	ND	0	0	0	ND	0.000196515
							∑HI ing/derm						4.35304	0.456615	4.80966
